# Supplementary material for: The Construction and Analysis of lncRNA–miRNA–mRNA Competing Endogenous RNA Network of Schwann Cells in Diabetic Peripheral Neuropathy
Source: Front Bioeng Biotechnol. 2020 May 25;8:490. doi: 10.3389/fbioe.2020.00490 (PMC7261901; doi:10.3389/fbioe.2020.00490)
Supplement: Supplementary file 6 [file Table_6.XLSX]

## Sheet: downregulated enriched pathways
pathID	pathDescription	geneRatio	bgRatio	pvalue	padj	qvalue	enrichScore	overlapGeneList	overlapGeneCount
rno04530	Tight junction	25/516	170/8848	1.59816e-05	0.00461868	0.00408792	2.52166	Cldn1/Dlg3/Mapk9/Slc9a3r1/F11r/Llgl2/Wasl/Amotl2/Cldn10/Itgb1/Tjp1/Myl12b/Prkab2/Ocln/Myh7b/Rapgef2/Cldn22/Was/Rock1/Cldn24/Dlg1/Jam2/Bves/Cgnl1/Epb41l4b	25
rno04514	Cell adhesion molecules (CAMs)	25/516	178/8848	3.54996e-05	0.00512969	0.00454021	2.40833	RT1-S3/Itga6/Cldn1/Mpzl1/F11r/Sdc2/Itgb8/Cntn2/Cldn10/Itgb1/Cdh5/Ocln/Cadm1/Nrxn2/Siglec1/Negr1/Icam2/Lrrc4c/Cldn22/Cldn24/Cd86/Jam2/Itga9/RT1-CE10/Nrxn1	25
rno04360	Axon guidance	25/516	183/8848	5.67357e-05	0.00546554	0.00483746	2.34253	Epha5/Srgap1/Efnb1/Epha7/Sema3d/Plxna2/Pak6/Efnb3/Itgb1/Sema4d/Efnb2/Myl12b/Sema3b/Ngef/Sema3f/Pik3r1/Sema4b/Slit1/Trpc5/Plxnb1/Robo2/Lrrc4c/Rock1/Met/Gnai1	25
rno04670	Leukocyte transendothelial migration	18/516	115/8848	0.000108302	0.0078248	0.00692561	2.68392	Rapgef4/Cldn1/Rhoh/F11r/Arhgap5/Cldn10/Itgb1/Cdh5/Myl12b/Ocln/Pik3r1/Cldn22/Rock1/Mapk12/Cldn24/Jam2/Gnai1/Rapgef3	18
rno00982	Drug metabolism - cytochrome P450	13/516	73/8848	0.000265028	0.0153186	0.0135583	3.05363	Fmo4/Fmo2/Fmo3/Mgst3/Aox4/Aox1/Gstm2/Gstm1/Maob/Gsta4/Fmo1/Fmo6/Aldh1a3	13
rno04512	ECM-receptor interaction	14/516	89/8848	0.000587515	0.0282986	0.0250467	2.69733	Itga6/Itgb4/Itgb8/Col6a5/Itgb1/Thbs4/Col4a3/Col4a5/Frem2/Col6a6/Itga9/Gp6/Lamb2/Itga1	14
rno00380	Tryptophan metabolism	9/516	48/8848	0.00158234	0.0594706	0.0526365	3.21512	Ehhadh/Kmo/Inmt/Aox4/Aox1/Il4i1/Maob/Kynu/Cyp1b1	9
rno04510	Focal adhesion	23/516	203/8848	0.00164624	0.0594706	0.0526365	1.9428	Itga6/Mapk9/Arhgap5/Itgb4/Itgb8/Pak6/Col6a5/Itgb1/Thbs4/Col4a3/Myl12b/Pik3r1/Col4a5/Col6a6/Rock1/Itga9/Kdr/Lamb2/Ccnd3/Ppp1r12b/Met/Itga1/Cav2	23
rno04390	Hippo signaling pathway	19/516	157/8848	0.00191227	0.061405	0.0543486	2.07515	Tgfb2/Areg/Dlg3/Tp53bp2/Llgl2/Wnt16/Gli2/Frmd6/Bmp4/Bmp6/Wnt2b/Wnt6/Fzd2/Crb2/Dlg1/Ccnd3/Wnt10a/Axin2/Wnt10b	19
rno00230	Purine metabolism	17/516	136/8848	0.00229934	0.0625552	0.0553667	2.14341	Enpp4/Pde8b/Papss2/Gucy1a3/Pde1c/Ak8/Nudt16/Pde5a/Nt5c1a/Entpd4/Nt5c2/Pde3a/Rrm2b/Gucy1a2/Hprt1/Ak3/Ak7	17
rno04022	cGMP-PKG signaling pathway	20/516	172/8848	0.00238099	0.0625552	0.0553667	1.99387	Irs3/Slc8a2/Pik3r6/Creb3l1/Atp1a2/Creb5/Adra1a/Gucy1a3/Adra2b/Pde5a/Nfatc1/Mrvi1/Adrb2/Pde3a/Gucy1a2/Rock1/Calml4/Kcnmb4/Gnai1/Adra1b	20
rno05217	Basal cell carcinoma	10/516	63/8848	0.00325348	0.0783547	0.0693505	2.72179	Wnt16/Gli2/Bmp4/Wnt2b/Wnt6/Gadd45b/Fzd2/Wnt10a/Axin2/Wnt10b	10
rno00250	Alanine, aspartate and glutamate metabolism	7/516	36/8848	0.00418926	0.0910592	0.0805951	3.33419	Abat/Folh1/Aspa/Il4i1/Aldh5a1/Rimklb/Nat8l	7
rno04261	Adrenergic signaling in cardiomyocytes	17/516	145/8848	0.00450588	0.0910592	0.0805951	2.01037	Rapgef4/Pik3r6/Creb3l1/Atp1a2/Creb5/Adra1a/Adrb2/Ppp2r3a/Scn4b/Scn7a/Mapk12/Tnnt2/Ppp1r1a/Calml4/Gnai1/Rapgef3/Adra1b	17
rno00280	Valine, leucine and isoleucine degradation	9/516	56/8848	0.00472625	0.0910592	0.0805951	2.75581	Ehhadh/Abat/Acaa2/Aox4/Aox1/Hmgcs2/Il4i1/Acadsb/Acad8	9
rno05100	Bacterial invasion of epithelial cells	11/516	78/8848	0.00529898	0.0957128	0.084714	2.41821	Sept11/Wasl/Itgb1/Cltb/Gab1/Pik3r1/Dnm3/Was/Met/Cav2/Elmo1	11
rno05165	Human papillomavirus infection	33/516	360/8848	0.00633723	0.106345	0.0941245	1.57183	RT1-S3/Itga6/Mx2/Dlg3/Slc9a3r1/Llgl2/Creb3l1/Itgb4/Wnt16/Itgb8/Creb5/Col6a5/Itgb1/Thbs4/Wnt2b/Col4a3/Rb1/Wnt6/Pik3r1/Col4a5/Fzd2/Ppp2r3a/Col6a6/Stat2/Dlg1/Itga9/Lamb2/RT1-CE10/Ccnd3/Wnt10a/Itga1/Axin2/Wnt10b	33
rno00600	Sphingolipid metabolism	8/516	49/8848	0.00687543	0.106345	0.0941245	2.79956	Smpd3/Cers4/Sgms2/Sptlc2/B4galt6/Gba2/Neu2/Acer3	8
rno05418	Fluid shear stress and atherosclerosis	17/516	152/8848	0.00722847	0.106345	0.0941245	1.91779	Mapk9/Mgst3/Sdc2/Bmp4/Txn1/Nqo1/Cdh5/Il1r2/Acvr2b/Pik3r1/Gstm2/Gstm1/Gsta4/Mapk12/Calml4/Kdr/Cav2	17
rno04550	Signaling pathways regulating pluripotency of stem cells	16/516	140/8848	0.00735953	0.106345	0.0941245	1.95969	Wnt16/Bmp4/Wnt2b/Acvr2b/Fgfr2/Fgfr3/Wnt6/Pcgf5/Pik3r1/Fzd2/Mapk12/LOC103692167/Wnt10a/Axin2/Jak2/Wnt10b	16
rno05225	Hepatocellular carcinoma	19/516	180/8848	0.00862531	0.11027	0.0975979	1.80999	Tgfb2/Mgst3/Wnt16/Nqo1/Wnt2b/Rb1/Wnt6/Gab1/Pik3r1/Gstm2/Gadd45b/Igf2/Fzd2/Gstm1/Gsta4/Wnt10a/Met/Axin2/Wnt10b	19
rno05205	Proteoglycans in cancer	21/516	206/8848	0.0087538	0.11027	0.0975979	1.74802	Hpse/Tgfb2/Sdc2/Wnt16/Itgb1/Rras2/Ptpn6/Wnt2b/Wnt6/Gab1/Pik3r1/Igf2/Fzd2/Rock1/Mapk12/Kdr/Ppp1r12b/Wnt10a/Met/Cav2/Wnt10b	21
rno04216	Ferroptosis	7/516	41/8848	0.00877578	0.11027	0.0975979	2.92759	Atg5/Sat1/NEWGENE_620180/Cp/Gclm/Fth1/Acsl6	7
rno04024	cAMP signaling pathway	21/516	210/8848	0.0107844	0.129863	0.114939	1.71473	Rapgef4/Mapk9/Creb3l1/Gria4/Atp1a2/Creb5/Acox1/Hcn2/Hcn4/Ptger3/Rras2/Htr1b/Nfatc1/Pik3r1/Adrb2/Fxyd1/Pde3a/Rock1/Calml4/Gnai1/Rapgef3	21
rno00120	Primary bile acid biosynthesis	4/516	16/8848	0.0118625	0.136973	0.121233	4.28682	Cyp7b1/Scp2/Cyp27a1/Ch25h	4
rno04151	PI3K-Akt signaling pathway	31/516	349/8848	0.0123229	0.136973	0.121233	1.52311	Itga6/Areg/Phlpp1/Pik3r6/Creb3l1/Itgb4/Itgb8/Creb5/Col6a5/Itgb1/Il7/Thbs4/Lpar1/Magi2/Col4a3/Fgfr2/Fgfr3/Pik3r1/Col4a5/Igf2/Ppp2r3a/Col6a6/Osm/Itga9/Kdr/Lamb2/Sgk3/Ccnd3/Met/Itga1/Jak2	31
rno05226	Gastric cancer	16/516	151/8848	0.014687	0.151905	0.134449	1.81693	Tgfb2/Wnt16/Cdkn2b/Wnt2b/Rb1/Fgfr2/Wnt6/Gab1/Pik3r1/Gadd45b/Fzd2/Rarb/Wnt10a/Met/Axin2/Wnt10b	16
rno04970	Salivary secretion	10/516	78/8848	0.0147174	0.151905	0.134449	2.19837	Cst3/Atp1a2/Adra1a/Gucy1a3/Slc12a2/Adrb2/Gucy1a2/Calml4/Chrm3/Adra1b	10
rno00750	Vitamin B6 metabolism	3/516	10/8848	0.0173881	0.173282	0.153369	5.14419	Aox4/Aox1/Pnpo	3
rno00480	Glutathione metabolism	9/516	69/8848	0.0181489	0.174834	0.154743	2.2366	Mgst3/Gclm/Chac1/Nat8f3/Gstm2/Rrm2b/Gstm1/Gsta4/Ggct	9
rno05145	Toxoplasmosis	13/516	118/8848	0.0196821	0.176602	0.156308	1.88911	Itga6/Ifngr2/Tgfb2/Mapk9/Pik3r6/Map2k3/Itgb1/Igtp/Irgm/Mapk12/Lamb2/Gnai1/Jak2	13
rno04974	Protein digestion and absorption	11/516	94/8848	0.0204436	0.176602	0.156308	2.0066	Col13a1/Slc8a2/Atp1a2/Col6a5/Slc7a9/Col4a3/Kcnj13/Col4a5/Col6a6/Dpp4/Ace2	11
rno00650	Butanoate metabolism	5/516	28/8848	0.0213144	0.176602	0.156308	3.06202	Ehhadh/Abat/Bdh2/Hmgcs2/Aldh5a1	5
rno00100	Steroid biosynthesis	4/516	19/8848	0.0219989	0.176602	0.156308	3.60996	Dhcr24/Sc5d/Lipa/Msmo1	4
rno00450	Selenocompound metabolism	4/516	19/8848	0.0219989	0.176602	0.156308	3.60996	Cth/Papss2/Inmt/Scly	4
rno00511	Other glycan degradation	4/516	19/8848	0.0219989	0.176602	0.156308	3.60996	Fuca2/Gba2/Neu2/Hexb	4
rno04015	Rap1 signaling pathway	20/516	213/8848	0.0235894	0.184252	0.163079	1.61007	Rapgef4/Prkd1/Rapgef5/Map2k3/Sipa1l1/Itgb1/Rala/Lpar1/Magi2/P2ry1/Fgfr2/Fgfr3/Pik3r1/Rapgef2/Mapk12/Calml4/Kdr/Met/Gnai1/Rapgef3	20
rno04070	Phosphatidylinositol signaling system	11/516	98/8848	0.0269751	0.205153	0.181578	1.9247	Plcd3/Dgkh/Inpp1/Inpp5d/Inpp4b/Pik3r1/Inpp5f/Cds2/Dgkb/Calml4/Pi4ka	11
rno05410	Hypertrophic cardiomyopathy (HCM)	10/516	88/8848	0.031582	0.23403	0.207137	1.94856	Itga6/Sgcd/Tgfb2/Itgb4/Itgb8/Itgb1/Prkab2/Tnnt2/Itga9/Itga1	10
rno04742	Taste transduction	10/516	89/8848	0.0338054	0.244244	0.216177	1.92666	Scn9a/Hcn4/Pde1c/Htr1b/P2ry1/Trpm5/Tas2r137/P2rx2/Chrm3/Cacna1a	10
rno00410	beta-Alanine metabolism	5/516	33/8848	0.0406106	0.286255	0.25336	2.59807	Ehhadh/Abat/Dpyd/Upb1/Aldh1a3	5
rno04130	SNARE interactions in vesicular transport	5/516	34/8848	0.0454203	0.301113	0.26651	2.52166	Snap29/Vamp4/Stx8/Stx17/Stx7	5
rno04310	Wnt signaling pathway	15/516	161/8848	0.0484538	0.301113	0.26651	1.59757	Mapk9/Lgr5/Wnt16/Wnt2b/Sfrp5/Nfatc1/Ctbp2/Wnt6/Fzd2/Rspo2/Cxxc4/Ccnd3/Wnt10a/Axin2/Wnt10b	15
rno04068	FoxO signaling pathway	13/516	134/8848	0.0485289	0.301113	0.26651	1.66354	Irs3/Tgfb2/Mapk9/Cdkn2b/Tnfsf10/Prkab2/Pik3r1/Gadd45b/Agap2/Mapk12/Foxo6/Sgk3/Gabarapl1	13
rno05222	Small cell lung cancer	10/516	95/8848	0.0494678	0.301113	0.26651	1.80498	Itga6/Cdkn2b/Itgb1/Col4a3/Rb1/Pik3r1/Col4a5/Gadd45b/Rarb/Lamb2	10
rno05211	Renal cell carcinoma	8/516	70/8848	0.0499795	0.301113	0.26651	1.95969	Tgfb2/Egln3/Pak6/Ets1/Gab1/Pik3r1/Epas1/Met	8
rno00240	Pyrimidine metabolism	7/516	58/8848	0.0504955	0.301113	0.26651	2.0695	Cmpk2/Nt5c1a/Entpd4/Dpyd/Nt5c2/Rrm2b/Upb1	7
rno04270	Vascular smooth muscle contraction	13/516	135/8848	0.0509826	0.301113	0.26651	1.65122	Adra1a/Gucy1a3/Mrvi1/Prkcq/Ramp1/Ramp2/Adm/Gucy1a2/Rock1/Calml4/Ppp1r12b/Kcnmb4/Adra1b	13
rno04144	Endocytosis	23/516	275/8848	0.0510537	0.301113	0.26651	1.43414	RT1-S3/Wasl/Ehd3/Eps15/Amph/Psd3/Rab11fip4/Fgfr2/Fgfr3/Cltb/Arap1/Agap2/Dnm3/Dab2/Was/Rab11fip3/RT1-CE10/Dnajc6/Rab11fip5/Arap2/Cav2/Rab11fip1/Iqsec1	23
rno00534	Glycosaminoglycan biosynthesis - heparan sulfate / heparin	4/516	25/8848	0.0546038	0.31561	0.279341	2.74357	Hs3st3b1/Hs6st1/Hs3st3a1/Hs6st2	4
rno04520	Adherens junction	8/516	73/8848	0.0613051	0.339423	0.300418	1.87915	Wasl/Tjp1/Ptpn6/Sorbs1/Was/Ptprj/Met/Lmo7	8
rno04810	Regulation of actin cytoskeleton	19/516	223/8848	0.0616723	0.339423	0.300418	1.46098	Itga6/Itgb4/Itgb8/Wasl/Pak6/Itgb1/Rras2/Lpar1/Myl12b/Fgfr2/Fgfr3/Pik3r1/Iqgap2/Was/Rock1/Itga9/Chrm3/Ppp1r12b/Itga1	19
rno00564	Glycerophospholipid metabolism	10/516	99/8848	0.0622472	0.339423	0.300418	1.73205	Pcyt1a/Lpin1/Dgkh/Ptdss2/Cds2/Pld4/Dgkb/Ache/Gpcpd1/Mboat7	10
rno04611	Platelet activation	12/516	130/8848	0.0763571	0.404543	0.358055	1.58283	Pik3r6/Itgb1/Gucy1a3/P2ry1/Myl12b/Pik3r1/Stim1/Gucy1a2/Rock1/Mapk12/Gp6/Gnai1	12
rno04933	AGE-RAGE signaling pathway in diabetic complications	10/516	103/8848	0.0769892	0.404543	0.358055	1.66479	Tgfb2/Mapk9/Plcd3/Col4a3/Nfatc1/Pik3r1/Col4a5/Stat5b/Mapk12/Jak2	10
rno00350	Tyrosine metabolism	5/516	40/8848	0.081109	0.415935	0.368138	2.14341	Aox4/Aox1/Il4i1/Maob/Aldh1a3	5
rno04934	Cushing syndrome	14/516	160/8848	0.0834749	0.415935	0.368138	1.50039	Pbx1/Creb3l1/Wnt16/Cdkn2b/Creb5/Pde8b/Wnt2b/Rb1/Wnt6/Fzd2/Wnt10a/Axin2/Gnai1/Wnt10b	14
rno05161	Hepatitis B	14/516	160/8848	0.0834749	0.415935	0.368138	1.50039	Tgfb2/Mapk9/Creb3l1/Ifih1/Ddx58/Map2k3/Creb5/Rb1/Nfatc1/Pik3r1/Stat5b/Stat2/Mapk12/Jak2	14
rno05414	Dilated cardiomyopathy (DCM)	9/516	92/8848	0.0871454	0.425965	0.377015	1.67745	Itga6/Sgcd/Tgfb2/Itgb4/Itgb8/Itgb1/Tnnt2/Itga9/Itga1	9
rno05220	Chronic myeloid leukemia	8/516	79/8848	0.0884356	0.425965	0.377015	1.73643	Bcr/Tgfb2/Gab2/Rb1/Ctbp2/Pik3r1/Stat5b/Gadd45b	8
rno04140	Autophagy - animal	12/516	134/8848	0.0909525	0.430906	0.381389	1.53558	Atg5/Irs3/Snap29/Mapk9/Stx17/Rras2/Pik3r1/Prkcq/Ctsd/LOC108348096/Gabarapl1/Rubcn	12
rno04071	Sphingolipid signaling pathway	11/516	125/8848	0.112277	0.500263	0.442775	1.50896	Cers4/Mapk9/Sgms2/Gab2/Sptlc2/Pik3r1/Ctsd/Ppp2r3a/Rock1/Mapk12/Gnai1	11
rno00640	Propanoate metabolism	4/516	32/8848	0.113382	0.500263	0.442775	2.14341	Ehhadh/Abat/Acss1/Ldhb	4
rno00760	Nicotinate and nicotinamide metabolism	4/516	32/8848	0.113382	0.500263	0.442775	2.14341	Aox4/Nt5c1a/Aox1/Nt5c2	4
rno04630	JAK-STAT signaling pathway	13/516	155/8848	0.118561	0.500263	0.442775	1.43816	Ifngr2/Il7/Ptpn6/Aox4/Aox1/Pik3r1/Stat5b/Lepr/Osm/Stat2/Cntfr/Ccnd3/Jak2	13
rno05160	Hepatitis C	13/516	155/8848	0.118561	0.500263	0.442775	1.43816	Oas1a/Cldn1/Mx2/Ddx58/Rsad2/Cldn10/Rb1/Ocln/Pik3r1/Cldn22/Stat2/Cldn24/Oas1b	13
rno00531	Glycosaminoglycan degradation	3/516	21/8848	0.120394	0.500263	0.442775	2.44961	Hpse/Hexb/Gns	3
rno05146	Amoebiasis	9/516	99/8848	0.122634	0.500263	0.442775	1.55884	Serpinb10/Tgfb2/Il1r2/Col4a3/Serpinb6b/Pik3r1/Col4a5/Serpinb9/Lamb2	9
rno05231	Choline metabolism in cancer	9/516	99/8848	0.122634	0.500263	0.442775	1.55884	Slc44a4/Pcyt1a/Mapk9/Wasl/Dgkh/Pik3r1/Dgkb/Was/Gpcpd1	9
rno04924	Renin secretion	7/516	72/8848	0.125284	0.500263	0.442775	1.6671	Gucy1a3/Pde1c/Adrb2/Pde3a/Gucy1a2/Calml4/Gnai1	7
rno04978	Mineral absorption	5/516	46/8848	0.128042	0.500263	0.442775	1.86384	NEWGENE_620180/Atp1a2/Heph/Fth1/Clcn2	5
rno04916	Melanogenesis	9/516	100/8848	0.12826	0.500263	0.442775	1.54326	Creb3l1/Wnt16/Wnt2b/Wnt6/Fzd2/Calml4/Wnt10a/Gnai1/Wnt10b	9
rno04380	Osteoclast differentiation	11/516	129/8848	0.131647	0.500263	0.442775	1.46217	Ifngr2/Tec/Tgfb2/Mapk9/Gab2/Nfatc1/Pik3r1/Stat2/Mapk12/Fcgr2b/Lilrb3a	11
rno00072	Synthesis and degradation of ketone bodies	2/516	11/8848	0.131806	0.500263	0.442775	3.11769	Bdh2/Hmgcs2	2
rno05412	Arrhythmogenic right ventricular cardiomyopathy (ARVC)	7/516	73/8848	0.13207	0.500263	0.442775	1.64426	Itga6/Sgcd/Itgb4/Itgb8/Itgb1/Itga9/Itga1	7
rno00360	Phenylalanine metabolism	3/516	22/8848	0.13369	0.500263	0.442775	2.33827	Il4i1/Maob/Aldh1a3	3
rno00071	Fatty acid degradation	5/516	47/8848	0.136861	0.500263	0.442775	1.82418	Ehhadh/Acox1/Acaa2/Acadsb/Acsl6	5
rno04218	Cellular senescence	15/516	189/8848	0.138574	0.500263	0.442775	1.3609	RT1-S3/Tgfb2/Map2k3/Cdkn2b/Ets1/Rras2/Rb1/Nfatc1/Pik3r1/Gadd45b/Mapk12/Calml4/RT1-CE10/Ccnd3/Igfbp3	15
rno04920	Adipocytokine signaling pathway	7/516	74/8848	0.139034	0.500263	0.442775	1.62204	Irs3/Mapk9/Prkab2/Prkcq/Lepr/Acsl6/Jak2	7
rno05133	Pertussis	7/516	74/8848	0.139034	0.500263	0.442775	1.62204	Mapk9/Serping1/Itgb1/Mapk12/Calml4/C3/Gnai1	7
rno05210	Colorectal cancer	8/516	88/8848	0.140212	0.500263	0.442775	1.55884	Tgfb2/Areg/Mapk9/Rala/Appl1/Pik3r1/Gadd45b/Axin2	8
rno05140	Leishmaniasis	7/516	75/8848	0.146174	0.515173	0.455972	1.60041	Ifngr2/Tgfb2/Itgb1/Ptpn6/Mapk12/C3/Jak2	7
rno01212	Fatty acid metabolism	6/516	62/8848	0.15148	0.527441	0.46683	1.65941	Ehhadh/Acox1/Scp2/Acaa2/Acadsb/Acsl6	6
rno04060	Cytokine-cytokine receptor interaction	20/516	269/8848	0.156537	0.53706	0.475343	1.27489	Ifngr2/Tgfb2/Il17re/Bmp4/Tnfrsf21/Il7/Tnfsf10/Bmp6/Tnfsf13/Il1r2/Acvr2b/Il34/Ackr3/Lepr/Osm/Tnfsf18/Ccl6/Eda/Cntfr/Tnfsf8	20
rno05224	Breast cancer	12/516	149/8848	0.159798	0.53706	0.475343	1.38099	Ncoa1/Ncoa3/Wnt16/Wnt2b/Rb1/Wnt6/Pik3r1/Gadd45b/Fzd2/Wnt10a/Axin2/Wnt10b	12
rno05235	PD-L1 expression and PD-1 checkpoint pathway in cancer	8/516	91/8848	0.160246	0.53706	0.475343	1.50745	Ifngr2/Map2k3/Ptpn6/Nfatc1/Pik3r1/Prkcq/Mapk12/Jak2	8
rno00340	Histidine metabolism	3/516	24/8848	0.161675	0.53706	0.475343	2.14341	Aspa/Maob/Aldh1a3	3
rno04660	T cell receptor signaling pathway	9/516	106/8848	0.164776	0.537665	0.475879	1.4559	Tec/Mapk9/Pak6/Ptpn6/Nfatc1/Pik3r1/Prkcq/Mapk12/Dlg1	9
rno04020	Calcium signaling pathway	15/516	195/8848	0.165579	0.537665	0.475879	1.31902	Slc8a2/Plcd3/Ptger1/Hrh1/Adra1a/Ptger3/Pde1c/Adrb2/Stim1/Phkb/P2rx2/Calml4/Chrm3/Cacna1a/Adra1b	15
rno04622	RIG-I-like receptor signaling pathway	6/516	64/8848	0.168245	0.540252	0.478169	1.60756	Atg5/Mapk9/Ifih1/Ddx58/Mapk12/Tmem173	6
rno04072	Phospholipase D signaling pathway	12/516	151/8848	0.170586	0.541751	0.479496	1.3627	Rapgef4/Pik3r6/Dgkh/Gab2/Rras2/Rala/Lpar1/Gab1/Pik3r1/Dnm3/Dgkb/Rapgef3	12
rno05168	Herpes simplex virus 1 infection	29/516	414/8848	0.173552	0.542695	0.480331	1.20114	RT1-S3/Oas1a/Ifngr2/Pou2f1/Ifih1/Ddx58/Zfp9/Zfp597/Pou2f3/Zfp612/Pik3r1/Zfp606/Zfp90/Cfp/Zfp563/Stat2/Oas1b/Zfp667/Zfp420/Tmem173/Zfp267/C3/Zfp560/LOC102549842/RT1-CE10/LOC102555083/Zfp763/Bst2/Jak2	29
rno00270	Cysteine and methionine metabolism	5/516	51/8848	0.174639	0.542695	0.480331	1.68111	Cth/Mat1a/Ldhb/Gclm/Il4i1	5
rno01521	EGFR tyrosine kinase inhibitor resistance	7/516	80/8848	0.184335	0.566731	0.501605	1.50039	Fgfr2/Fgfr3/Gab1/Pik3r1/Kdr/Met/Jak2	7
rno04931	Insulin resistance	9/516	110/8848	0.191571	0.58278	0.51581	1.40296	Mapk9/Creb3l1/Creb5/Tbc1d4/Ppp1r3b/Prkab2/Pik3r1/Prkcq/Pygm	9
rno00983	Drug metabolism - other enzymes	8/516	96/8848	0.196378	0.591181	0.523245	1.42894	Mgst3/Dpyd/Gstm2/Rrm2b/Gstm1/Gsta4/Upb1/Hprt1	8
rno03320	PPAR signaling pathway	7/516	82/8848	0.200655	0.595461	0.527034	1.46379	Ehhadh/Acox1/Scp2/Sorbs1/Cyp27a1/Hmgcs2/Acsl6	7
rno00260	Glycine, serine and threonine metabolism	4/516	40/8848	0.202745	0.595461	0.527034	1.71473	Cth/Tdh/Maob/Gcat	4
rno04350	TGF-beta signaling pathway	8/516	97/8848	0.203982	0.595461	0.527034	1.41421	Chrd/Tgfb2/Cdkn2b/Bmp4/Bmp6/Acvr2b/Rock1/Nbl1	8
rno04610	Complement and coagulation cascades	7/516	83/8848	0.209019	0.598356	0.529596	1.44616	Serping1/F13a1/Clu/Cfh/Cd59/C3/Cfb	7
rno04080	Neuroactive ligand-receptor interaction	25/516	361/8848	0.211119	0.598356	0.529596	1.18749	Ptger1/Gria4/Hrh1/Oprk1/Adra1a/Glrb/Ptger3/Htr1b/Gnrh1/Chrna5/Lpar1/P2ry14/Adra2b/P2ry1/Adrb2/Grik5/Lepr/Adm/P2rx2/C3/Kiss1/Npff/Chrm3/Adra1b/Galr2	25
rno04664	Fc epsilon RI signaling pathway	6/516	69/8848	0.21325	0.598356	0.529596	1.49107	Mapk9/Map2k3/Gab2/Inpp5d/Pik3r1/Mapk12	6
rno00604	Glycosphingolipid biosynthesis - ganglio series	2/516	15/8848	0.216723	0.598356	0.529596	2.2863	St3gal5/Hexb	2
rno04150	mTOR signaling pathway	12/516	159/8848	0.2171	0.598356	0.529596	1.29413	Lpin1/Wnt16/Castor1/Slc38a9/Wnt2b/Rnf152/Wnt6/Pik3r1/Fzd2/LOC108348096/Wnt10a/Wnt10b	12
rno05132	Salmonella infection	7/516	84/8848	0.217511	0.598356	0.529596	1.42894	Ifngr2/Mapk9/Wasl/Tjp1/Was/Rock1/Mapk12	7
rno04725	Cholinergic synapse	9/516	114/8848	0.220107	0.598356	0.529596	1.35373	Pik3r6/Creb3l1/Creb5/Pik3r1/Chrm3/Ache/Cacna1a/Gnai1/Jak2	9
rno00512	Mucin type O-glycan biosynthesis	3/516	28/8848	0.221989	0.598356	0.529596	1.83721	Galnt5/Galnt13/Gcnt1	3
rno05162	Measles	11/516	145/8848	0.225158	0.598356	0.529596	1.30083	Oas1a/Mx2/Mapk9/Ifih1/Ddx58/Pik3r1/Stat5b/Stat2/Oas1b/Fcgr2b/Ccnd3	11
rno04014	Ras signaling pathway	17/516	238/8848	0.225678	0.598356	0.529596	1.22481	Ets2/Mapk9/Rapgef5/Pak6/Ets1/Gab2/Rasa2/Rras2/Rala/Fgfr2/Fgfr3/Gab1/Pik3r1/Igf2/Calml4/Kdr/Met	17
rno04911	Insulin secretion	7/516	87/8848	0.243695	0.640254	0.566679	1.37967	Rapgef4/Creb3l1/Pclo/Atp1a2/Creb5/Chrm3/Kcnmb4	7
rno04728	Dopaminergic synapse	10/516	133/8848	0.247852	0.641332	0.567633	1.28927	Mapk9/Creb3l1/Gria4/Creb5/Ppp2r3a/Maob/Mapk12/Calml4/Cacna1a/Gnai1	10
rno04923	Regulation of lipolysis in adipocytes	5/516	58/8848	0.24859	0.641332	0.567633	1.47821	Irs3/Ptger3/Pik3r1/Adrb2/Gnai1	5
rno00730	Thiamine metabolism	2/516	17/8848	0.260849	0.641332	0.567633	2.01733	Ak8/Ak7	2
rno05164	Influenza A	12/516	166/8848	0.261661	0.641332	0.567633	1.23956	Oas1a/Mx2/Ifngr2/Ifih1/Ddx58/Rsad2/Tnfsf10/Pik3r1/Stat2/Oas1b/Ccnd3/Jak2	12
rno04211	Longevity regulating pathway	7/516	89/8848	0.261678	0.641332	0.567633	1.34866	Atg5/Irs3/Creb3l1/Creb5/Appl1/Prkab2/Pik3r1	7
rno04666	Fc gamma R-mediated phagocytosis	7/516	89/8848	0.261678	0.641332	0.567633	1.34866	Wasl/Gab2/Amph/Inpp5d/Pik3r1/Was/Fcgr2b	7
rno00980	Metabolism of xenobiotics by cytochrome P450	6/516	74/8848	0.261859	0.641332	0.567633	1.39032	Mgst3/Gstm2/Gstm1/Gsta4/Cyp1b1/Aldh1a3	6
rno05212	Pancreatic cancer	6/516	74/8848	0.261859	0.641332	0.567633	1.39032	Tgfb2/Mapk9/Rala/Rb1/Pik3r1/Gadd45b	6
rno05030	Cocaine addiction	4/516	47/8848	0.292942	0.706374	0.6252	1.45934	Creb3l1/Creb5/Maob/Gnai1	4
rno01040	Biosynthesis of unsaturated fatty acids	3/516	33/8848	0.302122	0.706374	0.6252	1.55884	Acox1/Scp2/Acot3	3
rno00562	Inositol phosphate metabolism	6/516	78/8848	0.302613	0.706374	0.6252	1.31902	Plcd3/Inpp1/Inpp5d/Inpp4b/Inpp5f/Pi4ka	6
rno00440	Phosphonate and phosphinate metabolism	1/516	6/8848	0.302765	0.706374	0.6252	2.85788	Pcyt1a	1
rno05142	Chagas disease (American trypanosomiasis)	8/516	109/8848	0.302886	0.706374	0.6252	1.25852	Ifngr2/Tlr6/Tgfb2/Mapk9/Pik3r1/Mapk12/C3/Gnai1	8
rno00770	Pantothenate and CoA biosynthesis	2/516	19/8848	0.305042	0.706374	0.6252	1.80498	Dpyd/Upb1	2
rno05230	Central carbon metabolism in cancer	5/516	63/8848	0.305525	0.706374	0.6252	1.3609	Fgfr2/Fgfr3/Ntrk3/Pik3r1/Met	5
rno04658	Th1 and Th2 cell differentiation	7/516	94/8848	0.308098	0.706668	0.625461	1.27693	Ifngr2/Mapk9/Nfatc1/Prkcq/Stat5b/Mapk12/Jak2	7
rno04620	Toll-like receptor signaling pathway	7/516	95/8848	0.31758	0.721486	0.638576	1.26348	Tlr6/Mapk9/Map2k3/Pik3r1/Mapk12/Tlr1/Cd86	7
rno02010	ABC transporters	4/516	49/8848	0.319731	0.721486	0.638576	1.39978	Abcb7/Abca8/Abca8a/Abca9	4
rno04152	AMPK signaling pathway	9/516	127/8848	0.322047	0.721486	0.638576	1.21516	Irs3/Creb3l1/Creb5/Adra1a/Hmgcr/Prkab2/Pik3r1/Ppp2r3a/Lepr	9
rno04137	Mitophagy - animal	5/516	65/8848	0.328846	0.729085	0.645302	1.31902	Atg5/Mapk9/Rras2/Optn/Gabarapl1	5
rno04930	Type II diabetes mellitus	4/516	50/8848	0.3332	0.729085	0.645302	1.37178	Irs3/Mapk9/Pik3r1/Cacna1a	4
rno04662	B cell receptor signaling pathway	6/516	81/8848	0.333899	0.729085	0.645302	1.27017	Ptpn6/Inpp5d/Nfatc1/Pik3r1/Fcgr2b/Lilrb3a	6
rno04142	Lysosome	9/516	129/8848	0.338597	0.729085	0.645302	1.19632	Laptm5/Mfsd8/Entpd4/Cltb/Lipa/Ap3b2/Ctsd/Hexb/Gns	9
rno05031	Amphetamine addiction	5/516	66/8848	0.340576	0.729085	0.645302	1.29904	Creb3l1/Gria4/Creb5/Maob/Calml4	5
rno05223	Non-small cell lung cancer	5/516	66/8848	0.340576	0.729085	0.645302	1.29904	Rb1/Pik3r1/Stat5b/Gadd45b/Rarb	5
rno00400	Phenylalanine, tyrosine and tryptophan biosynthesis	1/516	7/8848	0.343454	0.72984	0.64597	2.44961	Il4i1	1
rno00532	Glycosaminoglycan biosynthesis - chondroitin sulfate / dermatan sulfate	2/516	21/8848	0.348723	0.735628	0.651093	1.63307	Chst7/Chst15	2
rno04621	NOD-like receptor signaling pathway	12/516	180/8848	0.358402	0.75024	0.664026	1.14315	Atg5/Card6/Oas1a/Mapk9/Txn1/Stat2/Mapk12/Oas1b/Casp4/Gbp3/Tmem173/Gabarapl1	12
rno05167	Kaposi sarcoma-associated herpesvirus infection	14/516	213/8848	0.360842	0.75024	0.664026	1.12705	RT1-S3/Mapk9/Pik3r6/Rb1/Nfatc1/Pik3r1/Stat2/Mapk12/Calml4/Cd86/C3/RT1-CE10/Gabarapl1/Jak2	14
rno05203	Viral carcinogenesis	15/516	230/8848	0.364797	0.753045	0.666509	1.1183	RT1-S3/Hdac9/Creb3l1/Cdkn2b/Hdac11/Creb5/Rasa2/Rb1/Gtf2a1l/Pik3r1/Stat5b/Dlg1/C3/RT1-CE10/Ccnd3	15
rno04750	Inflammatory mediator regulation of TRP channels	8/516	117/8848	0.373878	0.766317	0.678256	1.17246	Mapk9/Map2k3/Hrh1/Pik3r1/Prkcq/Mapk12/Calml4/Asic1	8
rno04915	Estrogen signaling pathway	9/516	134/8848	0.380498	0.773784	0.684864	1.15168	Ncoa1/Creb3l1/Ncoa3/Creb5/Krt12/Pik3r1/Ctsd/Calml4/Gnai1	9
rno04919	Thyroid hormone signaling pathway	8/516	118/8848	0.382876	0.773784	0.684864	1.16253	Plcd3/Ncoa1/Ncoa3/Atp1a2/Tbc1d4/Bmp4/Rcan2/Pik3r1	8
rno04010	MAPK signaling pathway	19/516	300/8848	0.388242	0.776013	0.686838	1.08599	Tgfb2/Areg/Mapk9/Mapt/Map2k3/Rasa2/Rras2/Taok1/Fgfr2/Fgfr3/Nfatc1/Gadd45b/Igf2/Rapgef2/Mapk12/Mapk8ip2/Kdr/Cacna1a/Met	19
rno00900	Terpenoid backbone biosynthesis	2/516	23/8848	0.391442	0.776013	0.686838	1.49107	Hmgcr/Hmgcs2	2
rno05152	Tuberculosis	12/516	185/8848	0.394388	0.776013	0.686838	1.11226	Ifngr2/Tlr6/Tgfb2/Mapk9/Nfya/Ctsd/Mapk12/Calml4/Tlr1/Fcgr2b/C3/Jak2	12
rno04922	Glucagon signaling pathway	7/516	103/8848	0.39472	0.776013	0.686838	1.16535	Creb3l1/Creb5/Ldhb/Prkab2/Pygm/Phkb/Calml4	7
rno04960	Aldosterone-regulated sodium reabsorption	3/516	39/8848	0.39945	0.780006	0.690372	1.31902	Atp1a2/Pik3r1/Nr3c2	3
rno04012	ErbB signaling pathway	6/516	88/8848	0.407908	0.785903	0.695591	1.16913	Areg/Mapk9/Pak6/Gab1/Pik3r1/Stat5b	6
rno04146	Peroxisome	6/516	88/8848	0.407908	0.785903	0.695591	1.16913	Ehhadh/Acox1/Scp2/Phyh/Acsl6/Pxmp2	6
rno04910	Insulin signaling pathway	9/516	138/8848	0.414289	0.789525	0.698797	1.1183	Irs3/Mapk9/Ppp1r3b/Sorbs1/Prkab2/Pik3r1/Pygm/Phkb/Calml4	9
rno00740	Riboflavin metabolism	1/516	9/8848	0.417859	0.789525	0.698797	1.90525	Rfk	1
rno05166	Human T-cell leukemia virus 1 infection	16/516	255/8848	0.417984	0.789525	0.698797	1.07591	RT1-S3/Ets2/Tgfb2/Mapk9/Creb3l1/Cdkn2b/Creb5/Ets1/Il1r2/Rb1/Nfatc1/Pik3r1/Stat5b/Dlg1/RT1-CE10/Ccnd3	16
rno04115	p53 signaling pathway	5/516	74/8848	0.434584	0.810289	0.717174	1.1586	Gadd45b/Rrm2b/Ccnd3/Aifm2/Igfbp3	5
rno04917	Prolactin signaling pathway	5/516	74/8848	0.434584	0.810289	0.717174	1.1586	Mapk9/Pik3r1/Stat5b/Mapk12/Jak2	5
rno04727	GABAergic synapse	6/516	92/8848	0.450027	0.828186	0.733015	1.1183	Abat/Trak2/Plcl1/Cacna1a/Gabarapl1/Gnai1	6
rno00920	Sulfur metabolism	1/516	10/8848	0.451843	0.828186	0.733015	1.71473	Papss2	1
rno04659	Th17 cell differentiation	7/516	109/8848	0.45278	0.828186	0.733015	1.1012	Ifngr2/Mapk9/Nfatc1/Prkcq/Stat5b/Mapk12/Jak2	7
rno04962	Vasopressin-regulated water reabsorption	3/516	43/8848	0.462341	0.837699	0.741434	1.19632	Creb3l1/Arhgdib/Creb5	3
rno04110	Cell cycle	8/516	127/8848	0.463778	0.837699	0.741434	1.08014	Tgfb2/Cdkn2b/Wee1/Cdc14a/Rb1/Gadd45b/Ccnd3/Cdkn1c	8
rno05144	Malaria	4/516	60/8848	0.46673	0.837795	0.74152	1.14315	Tgfb2/Sdc2/Thbs4/Met	4
rno04668	TNF signaling pathway	7/516	111/8848	0.47193	0.841899	0.745152	1.08136	Ifi47/Mapk9/Creb3l1/Map2k3/Creb5/Pik3r1/Mapk12	7
rno04721	Synaptic vesicle cycle	5/516	78/8848	0.480665	0.847944	0.750503	1.09919	Slc6a2/Cltb/Dnm3/Cacna1a/Unc13c	5
rno05204	Chemical carcinogenesis	6/516	95/8848	0.481186	0.847944	0.750503	1.08299	Mgst3/Gstm2/Gstm1/Gsta4/Cyp1b1/Aldh1a3	6
rno04062	Chemokine signaling pathway	11/516	181/8848	0.488831	0.856194	0.757804	1.0421	Pik3r6/Wasl/Pik3r1/Stat5b/Ccl6/Was/Stat2/Rock1/Gnai1/Elmo1/Jak2	11
rno04730	Long-term depression	4/516	62/8848	0.492468	0.857369	0.758844	1.10628	Gucy1a3/Gucy1a2/Cacna1a/Gnai1	4
rno04625	C-type lectin receptor signaling pathway	7/516	114/8848	0.500324	0.858624	0.759955	1.0529	Mapk9/Rras2/Nfatc1/Pik3r1/Stat2/Mapk12/Calml4	7
rno05215	Prostate cancer	6/516	97/8848	0.501663	0.858624	0.759955	1.06066	Creb3l1/Creb5/Il1r2/Rb1/Fgfr2/Pik3r1	6
rno04213	Longevity regulating pathway - multiple species	4/516	63/8848	0.505142	0.858624	0.759955	1.08872	Atg5/Irs3/Prkab2/Pik3r1	4
rno04926	Relaxin signaling pathway	8/516	132/8848	0.507895	0.858624	0.759955	1.03923	Mapk9/Creb3l1/Creb5/Col4a3/Pik3r1/Col4a5/Mapk12/Gnai1	8
rno04392	Hippo signaling pathway - multiple species	2/516	29/8848	0.510835	0.858624	0.759955	1.18257	Frmd6/Fat4	2
rno05163	Human cytomegalovirus infection	15/516	253/8848	0.512453	0.858624	0.759955	1.01664	RT1-S3/Ptger1/Creb3l1/Creb5/Ptger3/Akap13/Rb1/Nfatc1/Pik3r1/Rock1/Mapk12/Calml4/Tmem173/RT1-CE10/Gnai1	15
rno00130	Ubiquinone and other terpenoid-quinone biosynthesis	1/516	12/8848	0.513986	0.858624	0.759955	1.42894	Nqo1	1
rno04650	Natural killer cell mediated cytotoxicity	6/516	99/8848	0.521849	0.86675	0.767147	1.03923	Ifngr2/Tnfsf10/Ptpn6/Nfatc1/Pik3r1/Icam2	6
rno01524	Platinum drug resistance	5/516	82/8848	0.52541	0.867676	0.767967	1.04557	Mgst3/Pik3r1/Gstm2/Gstm1/Gsta4	5
rno00062	Fatty acid elongation	2/516	31/8848	0.547103	0.893292	0.790639	1.10628	Acaa2/Acot3	2
rno00601	Glycosphingolipid biosynthesis - lacto and neolacto series	2/516	31/8848	0.547103	0.893292	0.790639	1.10628	St3gal6/B4galt4	2
rno05170	Human immunodeficiency virus 1 infection	14/516	243/8848	0.558971	0.907543	0.803253	0.98791	RT1-S3/Mapk9/Map2k3/Pak6/Wee1/Nfatc1/Trim5/Pik3r1/Mapk12/Calml4/Tmem173/RT1-CE10/Gnai1/Bst2	14
rno04927	Cortisol synthesis and secretion	4/516	68/8848	0.56623	0.910966	0.806282	1.00866	Pbx1/Creb3l1/Creb5/Pde8b	4
rno00533	Glycosaminoglycan biosynthesis - keratan sulfate	1/516	14/8848	0.569095	0.910966	0.806282	1.22481	B4galt4	1
rno04921	Oxytocin signaling pathway	9/516	157/8848	0.570536	0.910966	0.806282	0.982965	Pik3r6/Gucy1a3/Nfatc1/Prkab2/Gucy1a2/Rock1/Calml4/Ppp1r12b/Gnai1	9
rno04979	Cholesterol metabolism	3/516	51/8848	0.578254	0.914297	0.809231	1.00866	Lrpap1/Cyp27a1/Lipa	3
rno04136	Autophagy - other	2/516	33/8848	0.581447	0.914297	0.809231	1.03923	Atg5/Gabarapl1	2
rno04540	Gap junction	5/516	88/8848	0.589123	0.914297	0.809231	0.974278	Tjp1/Gucy1a3/Lpar1/Gucy1a2/Gnai1	5
rno04928	Parathyroid hormone synthesis, secretion and action	6/516	106/8848	0.589678	0.914297	0.809231	0.970601	Slc9a3r1/Creb3l1/Creb5/Akap13/Mmp24/Gnai1	6
rno00330	Arginine and proline metabolism	3/516	52/8848	0.591604	0.914297	0.809231	0.989267	Sat1/LOC108348083/Maob	3
rno00510	N-Glycan biosynthesis	3/516	52/8848	0.591604	0.914297	0.809231	0.989267	St6gal1/Mgat3/Mgat4a	3
rno04722	Neurotrophin signaling pathway	7/516	125/8848	0.599335	0.919372	0.813722	0.960248	Mapk9/Arhgdib/Gab1/Ntrk3/Pik3r1/Mapk12/Calml4	7
rno04217	Necroptosis	9/516	161/8848	0.60125	0.919372	0.813722	0.958544	Ifngr2/Mapk9/Tnfsf10/Stat5b/Pygm/Fth1/H2afy2/Stat2/Jak2	9
rno04918	Thyroid hormone synthesis	4/516	72/8848	0.611972	0.92568	0.819305	0.952627	Creb3l1/Atp1a2/Creb5/Asgr1	4
rno05218	Melanoma	4/516	72/8848	0.611972	0.92568	0.819305	0.952627	Rb1/Pik3r1/Gadd45b/Met	4
rno00603	Glycosphingolipid biosynthesis - globo and isoglobo series	1/516	16/8848	0.617967	0.92568	0.819305	1.07171	Hexb	1
rno04914	Progesterone-mediated oocyte maturation	5/516	91/8848	0.619165	0.92568	0.819305	0.942159	Mapk9/Cpeb2/Pik3r1/Mapk12/Gnai1	5
rno05169	Epstein-Barr virus infection	13/516	237/8848	0.631786	0.92568	0.819305	0.940568	RT1-S3/Oas1a/Mapk9/Ddx58/Map2k3/Rb1/Pik3r1/Gadd45b/Stat2/Mapk12/Oas1b/RT1-CE10/Ccnd3	13
rno05202	Transcriptional misregulation in cancer	10/516	184/8848	0.637543	0.92568	0.819305	0.931918	Klf3/Pbx1/Runx1t1/Wnt16/Eya1/Il1r2/Gadd45b/Cd86/Met/Igfbp3	10
rno01522	Endocrine resistance	5/516	93/8848	0.638455	0.92568	0.819305	0.921897	Mapk9/Ncoa3/Rb1/Pik3r1/Mapk12	5
rno05032	Morphine addiction	5/516	93/8848	0.638455	0.92568	0.819305	0.921897	Pde8b/Pde1c/Pde3a/Cacna1a/Gnai1	5
rno04971	Gastric acid secretion	4/516	75/8848	0.644258	0.92568	0.819305	0.914522	Atp1a2/Calml4/Chrm3/Gnai1	4
rno05214	Glioma	4/516	75/8848	0.644258	0.92568	0.819305	0.914522	Rb1/Pik3r1/Gadd45b/Calml4	4
rno04912	GnRH signaling pathway	5/516	94/8848	0.64787	0.92568	0.819305	0.91209	Mapk9/Map2k3/Gnrh1/Mapk12/Calml4	5
rno04961	Endocrine and other factor-regulated calcium reabsorption	3/516	57/8848	0.654151	0.92568	0.819305	0.902489	Atp1a2/Cltb/Dnm3	3
rno05150	Staphylococcus aureus infection	4/516	76/8848	0.654619	0.92568	0.819305	0.902489	Cfh/Fcgr2b/C3/Cfb	4
rno04657	IL-17 signaling pathway	5/516	95/8848	0.657131	0.92568	0.819305	0.902489	Usp25/Mapk9/Il17re/Mapk4/Mapk12	5
rno00061	Fatty acid biosynthesis	1/516	18/8848	0.661305	0.92568	0.819305	0.952627	Acsl6	1
rno00910	Nitrogen metabolism	1/516	18/8848	0.661305	0.92568	0.819305	0.952627	Car13	1
rno04370	VEGF signaling pathway	3/516	58/8848	0.665803	0.92568	0.819305	0.886929	Pik3r1/Mapk12/Kdr	3
rno05213	Endometrial cancer	3/516	58/8848	0.665803	0.92568	0.819305	0.886929	Pik3r1/Gadd45b/Axin2	3
rno05416	Viral myocarditis	5/516	96/8848	0.666233	0.92568	0.819305	0.893088	RT1-S3/Cxadr/Sgcd/Cd86/RT1-CE10	5
rno00620	Pyruvate metabolism	2/516	39/8848	0.672786	0.929173	0.822397	0.879348	Acss1/Ldhb	2
rno04640	Hematopoietic cell lineage	5/516	97/8848	0.675177	0.929173	0.822397	0.883881	Itga6/Il7/Il1r2/Cd59/Itga1	5
rno05033	Nicotine addiction	2/516	40/8848	0.686333	0.933651	0.82636	0.857364	Gria4/Cacna1a	2
rno05219	Bladder cancer	2/516	40/8848	0.686333	0.933651	0.82636	0.857364	Rb1/Fgfr3	2
rno04940	Type I diabetes mellitus	4/516	80/8848	0.694013	0.933651	0.82636	0.857364	RT1-S3/Ica1/Cd86/RT1-CE10	4
rno05034	Alcoholism	9/516	175/8848	0.699399	0.933651	0.82636	0.88186	Hdac9/Creb3l1/Hdac11/Creb5/Camkk1/H2afy2/Maob/Calml4/Gnai1	9
rno00860	Porphyrin and chlorophyll metabolism	2/516	41/8848	0.699416	0.933651	0.82636	0.836453	Cp/Heph	2
rno04713	Circadian entrainment	5/516	100/8848	0.701046	0.933651	0.82636	0.857364	Gria4/Gucy1a3/Gucy1a2/Calml4/Gnai1	5
rno04925	Aldosterone synthesis and secretion	5/516	100/8848	0.701046	0.933651	0.82636	0.857364	Prkd1/Creb3l1/Atp1a2/Creb5/Calml4	5
rno00561	Glycerolipid metabolism	3/516	62/8848	0.709534	0.939637	0.831659	0.829707	Lpin1/Dgkh/Dgkb	3
rno04973	Carbohydrate digestion and absorption	2/516	42/8848	0.712044	0.939637	0.831659	0.816537	Atp1a2/Pik3r1	2
rno04371	Apelin signaling pathway	7/516	141/8848	0.722834	0.941606	0.833401	0.851284	Slc8a2/Pik3r6/Rras2/Prkab2/Calml4/Gabarapl1/Gnai1	7
rno00514	Other types of O-glycan biosynthesis	1/516	22/8848	0.733812	0.941606	0.833401	0.779422	St6gal1	1
rno04964	Proximal tubule bicarbonate reclamation	1/516	22/8848	0.733812	0.941606	0.833401	0.779422	Atp1a2	1
rno00830	Retinol metabolism	4/516	85/8848	0.738607	0.941606	0.833401	0.806931	Aox4/Aox1/Dhrs3/Aldh1a1	4
rno01230	Biosynthesis of amino acids	4/516	86/8848	0.74691	0.941606	0.833401	0.797548	Cth/Mat1a/LOC108348083/Tktl1	4
rno04061	Viral protein interaction with cytokine and cytokine receptor	4/516	86/8848	0.74691	0.941606	0.833401	0.797548	Tnfsf10/Il34/Ackr3/Ccl6	4
rno03022	Basal transcription factors	2/516	45/8848	0.747281	0.941606	0.833401	0.762102	Gtf2a1l/Taf9b	2
rno04720	Long-term potentiation	3/516	66/8848	0.748736	0.941606	0.833401	0.779422	Ppp1r1a/Calml4/Rapgef3	3
rno05221	Acute myeloid leukemia	3/516	66/8848	0.748736	0.941606	0.833401	0.779422	Runx1t1/Pik3r1/Stat5b	3
rno05321	Inflammatory bowel disease (IBD)	3/516	66/8848	0.748736	0.941606	0.833401	0.779422	Ifngr2/Tgfb2/Nfatc1	3
rno03430	Mismatch repair	1/516	23/8848	0.749375	0.941606	0.833401	0.745534	Mlh3	1
rno04260	Cardiac muscle contraction	4/516	87/8848	0.75501	0.94458	0.836033	0.788381	Atp1a2/Casq2/Tnnt2/Cox7a1	4
rno00515	Mannose type O-glycan biosynthesis	1/516	24/8848	0.764029	0.945293	0.836665	0.71447	Chst10	1
rno04977	Vitamin digestion and absorption	1/516	24/8848	0.764029	0.945293	0.836665	0.71447	Folh1	1
rno00565	Ether lipid metabolism	2/516	47/8848	0.768664	0.945293	0.836665	0.729672	Pafah1b1/Pld4	2
rno03420	Nucleotide excision repair	2/516	47/8848	0.768664	0.945293	0.836665	0.729672	Ercc8/Cetn2	2
rno00592	alpha-Linolenic acid metabolism	1/516	25/8848	0.777828	0.952509	0.843051	0.685891	Acox1	1
rno04672	Intestinal immune network for IgA production	2/516	49/8848	0.788456	0.957272	0.847267	0.699889	Tnfsf13/Cd86	2
rno04744	Phototransduction	1/516	26/8848	0.790821	0.957272	0.847267	0.659511	Calml4	1
rno05332	Graft-versus-host disease	3/516	71/8848	0.791654	0.957272	0.847267	0.724533	RT1-S3/Cd86/RT1-CE10	3
rno00010	Glycolysis / Gluconeogenesis	3/516	72/8848	0.799466	0.962691	0.852063	0.71447	Acss1/Ldhb/Aldh1a3	3
rno00563	Glycosylphosphatidylinositol (GPI)-anchor biosynthesis	1/516	27/8848	0.803056	0.963001	0.852337	0.635085	Piga	1
rno04976	Bile secretion	3/516	73/8848	0.807032	0.96377	0.853018	0.704683	Atp1a2/Hmgcr/Slco1a2	3
rno05330	Allograft rejection	3/516	74/8848	0.814356	0.96572	0.854744	0.69516	RT1-S3/Cd86/RT1-CE10	3
rno04330	Notch signaling pathway	2/516	52/8848	0.815348	0.96572	0.854744	0.659511	Ctbp2/Dtx3l	2
rno00630	Glyoxylate and dicarboxylate metabolism	1/516	30/8848	0.835639	0.974583	0.862589	0.571576	Acss1	1
rno04710	Circadian rhythm	1/516	30/8848	0.835639	0.974583	0.862589	0.571576	Prkab2	1
rno04210	Apoptosis	6/516	141/8848	0.838556	0.974583	0.862589	0.729672	Ptpn13/Mapk9/Tnfsf10/Pik3r1/Gadd45b/Ctsd	6
rno04913	Ovarian steroidogenesis	2/516	55/8848	0.839144	0.974583	0.862589	0.623538	Bmp6/Cyp1b1	2
rno00030	Pentose phosphate pathway	1/516	31/8848	0.845257	0.974583	0.862589	0.553138	Tktl1	1
rno04623	Cytosolic DNA-sensing pathway	2/516	56/8848	0.846437	0.974583	0.862589	0.612403	Ddx58/Tmem173	2
rno05014	Amyotrophic lateral sclerosis (ALS)	2/516	56/8848	0.846437	0.974583	0.862589	0.612403	Map2k3/Mapk12	2
rno04064	NF-kappa B signaling pathway	4/516	102/8848	0.853687	0.975875	0.863732	0.672443	Ddx58/Prkcq/Gadd45b/Eda	4
rno00500	Starch and sucrose metabolism	1/516	32/8848	0.854313	0.975875	0.863732	0.535853	Pygm	1
rno05320	Autoimmune thyroid disease	3/516	81/8848	0.859286	0.977691	0.865339	0.635085	RT1-S3/Cd86/RT1-CE10	3
rno04726	Serotonergic synapse	5/516	126/8848	0.86607	0.981362	0.868588	0.680448	Htr1b/Maob/Cacna1a/Gnai1/Rapgef3	5
rno04215	Apoptosis - multiple species	1/516	34/8848	0.870869	0.981362	0.868588	0.504332	Mapk9	1
rno00310	Lysine degradation	2/516	60/8848	0.872699	0.981362	0.868588	0.571576	Ehhadh/LOC103690164	2
rno00140	Steroid hormone biosynthesis	3/516	85/8848	0.880437	0.986226	0.872894	0.605198	Cyp7b1/Hsd17b3/Cyp1b1	3
rno05216	Thyroid cancer	1/516	37/8848	0.892249	0.995598	0.881188	0.46344	Gadd45b	1
rno04145	Phagosome	8/516	198/8848	0.898432	0.998642	0.883882	0.69282	RT1-S3/Tlr6/Itgb1/Thbs4/Stx7/Fcgr2b/C3/RT1-CE10	8
rno04614	Renin-angiotensin system	1/516	40/8848	0.910094	0.999981	0.885068	0.428682	Ace2	1
rno04724	Glutamatergic synapse	4/516	116/8848	0.913145	0.999981	0.885068	0.591286	Gria4/Grik5/Cacna1a/Gnai1	4
rno05323	Rheumatoid arthritis	3/516	93/8848	0.914443	0.999981	0.885068	0.553138	Tgfb2/Tnfsf13/Cd86	3
rno00970	Aminoacyl-tRNA biosynthesis	2/516	69/8848	0.917363	0.999981	0.885068	0.497023	Pars2/Hars2	2
rno04120	Ubiquitin mediated proteolysis	5/516	141/8848	0.920451	0.999981	0.885068	0.60806	Mid1/Ercc8/Fbxo4/Uba7/Ube2ql1	5
rno04340	Hedgehog signaling pathway	1/516	43/8848	0.924989	0.999981	0.885068	0.398774	Gli2	1
rno04612	Antigen processing and presentation	3/516	101/8848	0.93942	0.999981	0.885068	0.509325	RT1-S3/Nfya/RT1-CE10	3
rno04972	Pancreatic secretion	3/516	101/8848	0.93942	0.999981	0.885068	0.509325	Atp1a2/Slc12a2/Chrm3	3
rno05322	Systemic lupus erythematosus	4/516	127/8848	0.943645	0.999981	0.885068	0.540072	Trim21/H2afy2/Cd86/C3	4
rno00520	Amino sugar and nucleotide sugar metabolism	1/516	48/8848	0.944543	0.999981	0.885068	0.357235	Hexb	1
rno04723	Retrograde endocannabinoid signaling	5/516	155/8848	0.952576	0.999981	0.885068	0.553138	Mapk9/Gria4/Mapk12/Cacna1a/Gnai1	5
rno04066	HIF-1 signaling pathway	3/516	107/8848	0.953528	0.999981	0.885068	0.480765	Ifngr2/Egln3/Pik3r1	3
rno03460	Fanconi anemia pathway	1/516	52/8848	0.956452	0.999981	0.885068	0.329756	Poln	1
rno04932	Non-alcoholic fatty liver disease (NAFLD)	5/516	159/8848	0.959292	0.999981	0.885068	0.539223	Mapk9/Prkab2/Pik3r1/Lepr/Cox7a1	5
rno03018	RNA degradation	2/516	84/8848	0.960783	0.999981	0.885068	0.408269	Nudt16/Pabpc4l	2
rno04141	Protein processing in endoplasmic reticulum	5/516	164/8848	0.966461	0.999981	0.885068	0.522783	Ero1b/Mapk9/Wfs1/Dnajb2/Yod1	5
rno04114	Oocyte meiosis	3/516	116/8848	0.96905	0.999981	0.885068	0.443464	Cpeb2/Mapk12/Calml4	3
rno05134	Legionellosis	1/516	58/8848	0.969703	0.999981	0.885068	0.295643	C3	1
rno03015	mRNA surveillance pathway	2/516	95/8848	0.977652	0.999981	0.885068	0.360996	Ppp2r3a/Pabpc4l	2
rno05206	MicroRNAs in cancer	9/516	271/8848	0.979948	0.999981	0.885068	0.569467	Tgfb2/Spry2/Dicer1/Reck/Fgfr3/Rock1/Mir181b1/Cyp1b1/Met	9
rno05016	Huntington disease	6/516	202/8848	0.98051	0.999981	0.885068	0.509325	Dnah9/Creb3l1/Dnah11/Creb5/Cltb/Cox7a1	6
rno01200	Carbon metabolism	3/516	127/8848	0.981408	0.999981	0.885068	0.405054	Ehhadh/Acss1/Tktl1	3
rno04714	Thermogenesis	7/516	245/8848	0.990554	0.999981	0.885068	0.489922	Creb3l1/Map2k3/Creb5/Prkab2/Acsl6/Mapk12/Cox7a1	7
rno05012	Parkinson disease	3/516	152/8848	0.994409	0.999981	0.885068	0.338433	Uba7/Cox7a1/Gnai1	3
rno03008	Ribosome biogenesis in eukaryotes	1/516	89/8848	0.995371	0.999981	0.885068	0.192666	Sbds	1
rno05010	Alzheimer disease	3/516	185/8848	0.998935	0.999981	0.885068	0.278064	Mapt/Calml4/Cox7a1	3
rno03013	RNA transport	2/516	168/8848	0.999566	0.999981	0.885068	0.204134	Pabpc4l/Fmr1	2
rno00190	Oxidative phosphorylation	1/516	143/8848	0.999827	0.999981	0.885068	0.119911	Cox7a1	1
rno03010	Ribosome	1/516	179/8848	0.999981	0.999981	0.885068	0.0957949	Rpl30	1

## Sheet: upregulated enriched pathways
pathID	pathDescription	geneRatio	bgRatio	pvalue	padj	qvalue	enrichScore	overlapGeneList	overlapGeneCount
rno05322	Systemic lupus erythematosus	35/598	127/8848	2.72379e-13	8.22585e-11	7.62662e-11	4.07763	Cd80/Snrpb/H2afz/H2afx/LOC100910200/Hist2h3c2/Hist2h2ac/Hist1h2ao/LOC103690002/LOC102548682/LOC684762/H2afj/LOC100912564/Hist1h2ail1/Hist1h3a/Hist2h4/Hist2h2aa2/Hist2h4a/LOC102549173/Hist1h2ah/LOC100912489/LOC100910554/Hist2h2aa3/Hist1h2ak/Hist1h2bl/Hist1h2bo/Hist1h2bk/Hist1h2an/Hist1h2bh/Hist1h2ai/LOC100365043/Hist1h2ac/LOC102549061/LOC103690190/Hist1h2bd	35
rno05034	Alcoholism	38/598	175/8848	7.2438e-11	1.09381e-08	1.01413e-08	3.21284	Hdac8/H2afz/H2afx/Shc3/Gng8/LOC100910200/Hist2h3c2/Hist2h2ac/Hist1h2ao/LOC103690002/LOC102548682/LOC684762/H2afj/LOC100912564/Hist1h2ail1/Hist1h3a/Npy/Hist2h4/Fosb/Hist2h2aa2/Hist2h4a/LOC102549173/Hist1h2ah/LOC100912489/LOC100910554/Hist2h2aa3/Hist1h2ak/Hist1h2bl/Hist1h2bo/Hist1h2bk/Hist1h2an/Hist1h2bh/Hist1h2ai/LOC100365043/Hist1h2ac/LOC102549061/LOC103690190/Hist1h2bd	38
rno04115	p53 signaling pathway	18/598	74/8848	1.36769e-06	0.00013768	0.000127651	3.59902	Cdkn1a/Cdk1/Serpine1/Rprm/Zmat3/Casp3/Tp53/Bid/Gtse1/LOC100911519/Bax/Cdk4/Chek2/Thbs1/Steap3/Rrm2/Ccnb1/Cdkn2a	18
rno05202	Transcriptional misregulation in cancer	29/598	184/8848	1.47041e-05	0.00111016	0.00102929	2.33198	Cdkn1a/Erg/Runx1/Bcl11b/Id2/Six4/Gria3/Ewsr1/Rxra/Tp53/Cebpa/Maf/Mlf1/Wt1/Etv4/Bax/Cdk9/Six1/Fus/Dusp6/Hist2h3c2/Nfkbiz/Mmp3/LOC684762/Hist1h2ail1/Hist1h3a/LOC102549173/Tcf3/Cebpb	29
rno04110	Cell cycle	22/598	127/8848	3.63675e-05	0.0021966	0.00203658	2.56308	Cdkn1a/Cdk1/Mcm7/Mcm4/Pttg1/Bub1b/Tp53/Espl1/Ccna2/E2f4/Plk1/Tfdp1/Cdc25c/Cdk4/Cdc20/Ttk/Bub1/Chek2/Cdc45/Dbf4/Ccnb1/Cdkn2a	22
rno05203	Viral carcinogenesis	32/598	230/8848	6.97069e-05	0.00350858	0.00325299	2.05857	Cdkn1a/Cdk1/Gtf2h4/Hdac8/Casp3/Tp53/Pkm/Ccna2/Ltbr/Bax/LOC100910200/Sp100/Ddx3x/Cdk4/Rbpjl/LOC100364062/Cdc20/RT1-T24-1/LOC102548682/LOC100912564/Hist2h4/Hist2h4a/LOC100912489/Hist1h2bl/Hist1h2bo/Hist1h2bk/LOC103695118/Hist1h2bh/LOC100365043/Cdkn2a/LOC102549061/Hist1h2bd	32
rno04217	Necroptosis	24/598	161/8848	0.000193208	0.00833556	0.00772834	2.20561	Pla2g4a/H2afz/H2afx/Bid/Pycard/Bax/Ppia/Hist2h2ac/Hist1h2ao/LOC103690002/Pgam5/Slc25a5/Mlkl/H2afj/Hist2h2aa2/Hist1h2ah/LOC100910554/Hist2h2aa3/Hist1h2ak/Glud1/Hist1h2an/Hist1h2ai/Hist1h2ac/LOC103690190	24
rno05014	Amyotrophic lateral sclerosis (ALS)	12/598	56/8848	0.00028975	0.00983271	0.00911642	3.17057	Daxx/Casp3/Tp53/Bid/Nefl/Nefm/Tomm40/Bax/Map3k5/Gria1/Gpx1/Map2k3	12
rno00230	Purine metabolism	21/598	136/8848	0.000293028	0.00983271	0.00911642	2.28467	Ak2/Nudt9/Nme1/Adss/Pde4b/Xdh/Pkm/Adk/Pde7b/Enpp3/Enpp1/Npr1/Adcy7/Gucy2g/Uox/Nt5c3b/Ampd2/Itpa/LOC100364062/Pde1a/Rrm2	21
rno04657	IL-17 signaling pathway	16/598	95/8848	0.000570271	0.0172222	0.0159676	2.49196	Ccl7/Traf3ip2/Ptgs2/Cxcl1/Cxcl6/Ccl2/Mmp13/Casp3/Traf4/Lcn2/Ccl20/Il17b/Cxcl3/Mmp3/Fosb/Cebpb	16
rno03008	Ribosome biogenesis in eukaryotes	15/598	89/8848	0.000833642	0.0228873	0.02122	2.49371	Ran/Pwp2/Utp18/Utp14a/Pop1/Nop56/Riok2/Imp4/Utp6/Rexo2/Fbl/Utp4/Pop7/Rn5-8s/Gar1	15
rno04668	TNF signaling pathway	17/598	111/8848	0.00118425	0.0298036	0.0276325	2.26605	Ptgs2/Cxcl1/Socs3/Ccl2/Casp3/Mmp14/Il18r1/Ccl20/Cxcl3/Map3k5/Mmp3/Pgam5/Mlkl/Bag4/Junb/Map2k3/Cebpb	17
rno04923	Regulation of lipolysis in adipocytes	11/598	58/8848	0.00150898	0.0327728	0.0303854	2.80614	Abhd5/Ptgs2/Tshr/Ptgs1/Aqp7/Fabp4/Mgll/Npr1/Adcy7/Plin1/Npy	11
rno00220	Arginine biosynthesis	6/598	20/8848	0.00158836	0.0327728	0.0303854	4.4388	Asl/Got2/Nags/Glud1/LOC497963/Gpt2	6
rno01230	Biosynthesis of amino acids	14/598	86/8848	0.00173631	0.0327728	0.0303854	2.40865	Asl/Pycr2/Pah/Pkm/Got2/Bcat1/Eno1/LOC108351137/Nags/LOC100364062/Pgam1/LOC100911515/Pgk1/Gpt2	14
rno04061	Viral protein interaction with cytokine and cytokine receptor	14/598	86/8848	0.00173631	0.0327728	0.0303854	2.40865	Ccl7/Cxcl1/Cxcl6/Ccr1/Ccl2/Ackr4/Cxcl14/Il18r1/Ccl20/Ltbr/Cxcl9/Cxcl13/Cxcl3/Il18rap	14
rno03320	PPAR signaling pathway	13/598	82/8848	0.00318435	0.056569	0.0524481	2.34571	Adipoq/Rxra/Aqp7/Acsl1/Fabp4/Lpl/LOC681458/Scd/Plin1/Acsl5/Acsl4/Plin4/Slc27a6	13
rno05219	Bladder cancer	8/598	40/8848	0.00463827	0.0778198	0.0721508	2.9592	Cdkn1a/Tp53/Mmp2/Dapk1/Cdk4/Tymp/Thbs1/Cdkn2a	8
rno00534	Glycosaminoglycan biosynthesis - heparan sulfate / heparin	6/598	25/8848	0.00543464	0.0857115	0.0794676	3.55104	Ndst3/B3galt6/Ext1/Ndst2/Xylt1/NEWGENE_1304700	6
rno00910	Nitrogen metabolism	5/598	18/8848	0.00567626	0.0857115	0.0794676	4.11	Car4/Car3/Car9/Car12/Glud1	5
rno01210	2-Oxocarboxylic acid metabolism	5/598	19/8848	0.00728265	0.104731	0.097102	3.89368	Got2/Aadat/Bcat1/Nags/Gpt2	5
rno04924	Renin secretion	11/598	72/8848	0.00850733	0.116782	0.108275	2.2605	Kcnj2/Kcnma1/Cacna1c/Adcyap1r1/Clca2/Npr1/Agt/Plcb4/Clca4l/Pde1a/Ace	11
rno00250	Alanine, aspartate and glutamate metabolism	7/598	36/8848	0.00929063	0.12199	0.113103	2.877	Asl/Gfpt2/Adss/Got2/Gfpt1/Glud1/Gpt2	7
rno00532	Glycosaminoglycan biosynthesis - chondroitin sulfate / dermatan sulfate	5/598	21/8848	0.011394	0.143374	0.13293	3.52285	Chst12/Chst11/Csgalnact1/B3galt6/Xylt1	5
rno04060	Cytokine-cytokine receptor interaction	28/598	269/8848	0.0145071	0.174501	0.161789	1.5401	Ccl7/Cxcl1/Cxcl6/Il1rn/Ccr1/Ccl2/Ackr4/Cxcl14/Eda2r/Il1rl2/Il1rl1/Il18r1/Il4r/Ccl20/Ltbr/Il17b/Gdf1/Il9r/Cxcl9/Cxcl13/Cxcl16/Cxcl3/Edar/Acvrl1/Ifnlr1/Tnfsf9/Gdf10/Il18rap	28
rno00240	Pyrimidine metabolism	9/598	58/8848	0.0150232	0.174501	0.161789	2.29593	Nme1/Upp1/Enpp3/Enpp1/Nt5c3b/Dctpp1/Tymp/Tk1/Rrm2	9
rno04512	ECM-receptor interaction	12/598	89/8848	0.0161439	0.180573	0.167418	1.99496	Ibsp/Tnn/Itga11/Sdc4/Sv2a/Itga10/Spp1/Thbs1/Itga5/Itga2/Hmmr/Sdc1	12
rno04216	Ferroptosis	7/598	41/8848	0.0187026	0.201721	0.187026	2.52614	Slc39a14/Acsl1/Tp53/Acsl5/Gss/Acsl4/Steap3	7
rno00270	Cysteine and methionine metabolism	8/598	51/8848	0.0200343	0.208633	0.193435	2.32094	Tst/Sms/Got2/Ldha/Bcat1/Ahcy/Gss/Kyat3	8
rno00010	Glycolysis / Gluconeogenesis	10/598	72/8848	0.0222096	0.223577	0.20729	2.055	Aldh3a1/Pkm/Ldha/Eno1/LOC108351137/LOC100364062/Adh7/Pgam1/LOC100911515/Pgk1	10
rno03040	Spliceosome	16/598	138/8848	0.02358	0.229715	0.212981	1.71548	Thoc3/Srsf2/Snrpc/Ppil1/Snrpf/Snrpb/Hnrnpm/Snrnp40/Sf3b5/U2af2/Sf3b3/Lsm4/Ddx46/LOC100360750/Hnrnpa1/Lsm2	16
rno05222	Small cell lung cancer	12/598	95/8848	0.0258079	0.243562	0.225819	1.86897	Cdkn1a/Ptgs2/Rxra/Casp3/Tp53/Traf4/Cks2/Bax/Cdk4/Cks1b/LOC497963/Itga2	12
rno00061	Fatty acid biosynthesis	4/598	18/8848	0.0295558	0.27048	0.250776	3.288	Mcat/Acsl1/Acsl5/Acsl4	4
rno00770	Pantothenate and CoA biosynthesis	4/598	19/8848	0.0354953	0.315281	0.292314	3.11494	Enpp3/Enpp1/Bcat1/Ppcdc	4
rno04933	AGE-RAGE signaling pathway in diabetic complications	12/598	103/8848	0.0445003	0.383974	0.356003	1.7238	Serpine1/Col3a1/Vegfd/Ccl2/Casp3/Vegfc/Mmp2/Agt/Bax/Cdk4/Plcb4/Nox1	12
rno04114	Oocyte meiosis	13/598	116/8848	0.0488924	0.410153	0.380275	1.65817	Cdk1/Rps6ka6/Pttg1/Aurka/Ar/Pgr/Espl1/Adcy7/Plk1/Cdc25c/Cdc20/Bub1/Ccnb1	13
rno05412	Arrhythmogenic right ventricular cardiomyopathy (ARVC)	9/598	73/8848	0.0564115	0.431466	0.400035	1.82416	Sgcb/Itga11/Cacna1c/Sgcg/Itga10/Cacna2d1/Dsc2/Itga5/Itga2	9
rno04066	HIF-1 signaling pathway	12/598	107/8848	0.0566987	0.431466	0.400035	1.65936	Cdkn1a/Serpine1/Angpt4/Angpt1/Timp1/Ldha/Eno1/LOC108351137/Pfkfb3/Ltbr/LOC497963/Pgk1	12
rno00232	Caffeine metabolism	2/598	6/8848	0.0570171	0.431466	0.400035	4.932	Xdh/Uox	2
rno00360	Phenylalanine metabolism	4/598	22/8848	0.0571479	0.431466	0.400035	2.69018	Aldh3a1/Pah/LOC103694877/Got2	4
rno00533	Glycosaminoglycan biosynthesis - keratan sulfate	3/598	14/8848	0.0639529	0.471067	0.436751	3.17057	St3gal1/Chst2/B4galt1	3
rno05410	Hypertrophic cardiomyopathy (HCM)	10/598	88/8848	0.0722145	0.519257	0.48143	1.68136	Sgcb/Itga11/Cacna1c/Sgcg/Agt/Itga10/Cacna2d1/Itga5/Itga2/Ace	10
rno00400	Phenylalanine, tyrosine and tryptophan biosynthesis	2/598	7/8848	0.0763228	0.536034	0.496986	4.22742	Pah/Got2	2
rno03022	Basal transcription factors	6/598	45/8848	0.0804715	0.551668	0.51148	1.9728	Gtf2h4/Taf5l/Taf6l/Taf4b/Taf12/LOC103695118	6
rno04914	Progesterone-mediated oocyte maturation	10/598	91/8848	0.0861817	0.551668	0.51148	1.62593	Cdk1/Rps6ka6/Aurka/Pgr/Adcy7/Ccna2/Plk1/Cdc25c/Bub1/Ccnb1	10
rno04927	Cortisol synthesis and secretion	8/598	68/8848	0.0865538	0.551668	0.51148	1.7407	Cacna1c/Cyp11a1/Kcnk3/Adcy7/Agt/Mrap/Plcb4/Hsd3b3	8
rno04978	Mineral absorption	6/598	46/8848	0.0875398	0.551668	0.51148	1.92991	Steap1/S100g/Steap2/Atp1a1/Mt1/Mt2A	6
rno04218	Cellular senescence	18/598	189/8848	0.0876823	0.551668	0.51148	1.40914	Cdkn1a/Traf3ip2/Cdk1/Serpine1/Foxm1/Mybl2/Tp53/Ccna2/E2f4/Nfatc4/Lin37/Cdk4/RT1-T24-1/Chek2/Slc25a5/Map2k3/Ccnb1/Cdkn2a	18
rno05414	Dilated cardiomyopathy (DCM)	10/598	92/8848	0.0911774	0.56195	0.521013	1.60826	Sgcb/Itga11/Cacna1c/Sgcg/Adcy7/Agt/Itga10/Cacna2d1/Itga5/Itga2	10
rno01524	Platinum drug resistance	9/598	82/8848	0.100758	0.592687	0.549511	1.62395	Cdkn1a/Casp3/Tp53/Bid/Bax/Map3k5/Birc5/Top2a/Cdkn2a	9
rno00520	Amino sugar and nucleotide sugar metabolism	6/598	48/8848	0.102657	0.592687	0.549511	1.8495	Gfpt2/Uap1/Amdhd2/Nans/Gfpt1/Uxs1	6
rno04062	Chemokine signaling pathway	17/598	181/8848	0.10443	0.592687	0.549511	1.38968	Ccl7/Cxcl1/Cxcl6/Ccr1/Ccl2/Cxcl14/Shc3/Adcy7/Ccl20/Gng8/Nfkbib/Cxcl9/Cxcl13/Cxcl16/Cxcl3/Arrb1/Plcb4	17
rno00563	Glycosylphosphatidylinositol (GPI)-anchor biosynthesis	4/598	27/8848	0.105547	0.592687	0.549511	2.192	Pign/Pigq/Pigg/Pigb	4
rno04926	Relaxin signaling pathway	13/598	132/8848	0.109256	0.592687	0.549511	1.45718	Col3a1/Vegfd/Mmp13/Vegfc/Shc3/Adcy7/Mmp2/Gng8/Rxfp1/Arrb1/Plcb4/LOC497963/Acta2	13
rno05218	Melanoma	8/598	72/8848	0.111445	0.592687	0.549511	1.644	Cdkn1a/Fgf7/Tp53/Pdgfrb/Bax/Cdk4/Fgf18/Cdkn2a	8
rno03018	RNA degradation	9/598	84/8848	0.112735	0.592687	0.549511	1.58528	Btg2/Btg1/Exosc2/Lsm1/Eno1/Lsm4/Exosc5/LOC100360750/Lsm2	9
rno00512	Mucin type O-glycan biosynthesis	4/598	28/8848	0.116919	0.592687	0.549511	2.11371	Galnt10/Galnt16/St3gal1/Gcnt3	4
rno04932	Non-alcoholic fatty liver disease (NAFLD)	15/598	159/8848	0.118374	0.592687	0.549511	1.39585	Adipoq/Socs3/Ndufa4/Rxra/Casp3/Cebpa/Bid/Cyc1/Uqcr11/Uqcrfs1/Bax/Map3k5/Uqcrq/Ndufa11/Cox7b	15
rno04350	TGF-beta signaling pathway	10/598	97/8848	0.118689	0.592687	0.549511	1.52536	Grem2/Id2/Fst/E2f4/Tgif1/Tfdp1/Grem1/Thbs1/LOC103691556/Lefty2	10
rno00740	Riboflavin metabolism	2/598	9/8848	0.119715	0.592687	0.549511	3.288	Enpp3/Enpp1	2
rno04122	Sulfur relay system	2/598	9/8848	0.119715	0.592687	0.549511	3.288	Tst/Ctu2	2
rno00561	Glycerolipid metabolism	7/598	62/8848	0.123369	0.600195	0.556472	1.67051	Lpl/Mgll/Dgat2/Lpin3/Pnpla3/Dgkd/Dgat1	7
rno04920	Adipocytokine signaling pathway	8/598	74/8848	0.125206	0.600195	0.556472	1.59957	Adipoq/Socs3/Rxra/Acsl1/Acsl5/Acsl4/Nfkbib/Npy	8
rno00564	Glycerophospholipid metabolism	10/598	99/8848	0.130856	0.6045	0.560464	1.49454	Pla2g4a/Pgs1/Lypla2/Lpin3/Dgkd/Plb1/Pcyt2/Mboat7l1/Pemt/Gpd1	10
rno05217	Basal cell carcinoma	7/598	63/8848	0.131227	0.6045	0.560464	1.644	Cdkn1a/Tp53/Gli3/Wnt5a/Fzd7/Hhip/Bax	7
rno04260	Cardiac muscle contraction	9/598	87/8848	0.132109	0.6045	0.560464	1.53062	Cacna1c/Cyc1/Uqcr11/Uqcrfs1/Atp1a1/Cacna2d1/Uqcrq/Myl4/Cox7b	9
rno00330	Arginine and proline metabolism	6/598	52/8848	0.136647	0.606874	0.562665	1.70723	Pycr2/Sms/Got2/P4ha3/Hoga1/LOC497963	6
rno03460	Fanconi anemia pathway	6/598	52/8848	0.136647	0.606874	0.562665	1.70723	Rad51c/Fanci/Eme1/Rad51/Brip1/Fancd2	6
rno03440	Homologous recombination	5/598	41/8848	0.140604	0.615396	0.570566	1.80439	Rad51c/Bard1/Eme1/Rad51/Brip1	5
rno00920	Sulfur metabolism	2/598	10/8848	0.143202	0.617815	0.572809	2.9592	Tst/Impad1	2
rno04340	Hedgehog signaling pathway	5/598	43/8848	0.162376	0.684644	0.63477	1.72046	Cdon/Gli3/Hhip/Arrb1/Gas1	5
rno05220	Chronic myeloid leukemia	8/598	79/8848	0.163226	0.684644	0.63477	1.49833	Cdkn1a/Runx1/Tp53/Mecom/Shc3/Bax/Cdk4/Cdkn2a	8
rno00760	Nicotinate and nicotinamide metabolism	4/598	32/8848	0.167181	0.691625	0.641242	1.8495	Bst1/Enpp3/Enpp1/Nt5c3b	4
rno01522	Endocrine resistance	9/598	93/8848	0.175641	0.709461	0.657779	1.43187	Cdkn1a/Notch3/Tp53/Shc3/Adcy7/Mmp2/Bax/Cdk4/Cdkn2a	9
rno04928	Parathyroid hormone synthesis, secretion and action	10/598	106/8848	0.178361	0.709461	0.657779	1.39585	Cdkn1a/Pde4b/Mmp13/Rxra/Mmp14/Adcy7/Pth1r/Arrb1/Plcb4/Cyp27b1	10
rno01040	Biosynthesis of unsaturated fatty acids	4/598	33/8848	0.180787	0.709461	0.657779	1.79345	Acot7/LOC681458/Scd/Acot5	4
rno04964	Proximal tubule bicarbonate reclamation	3/598	22/8848	0.182987	0.709461	0.657779	2.01763	Car4/Atp1a1/Glud1	3
rno00480	Glutathione metabolism	7/598	69/8848	0.183238	0.709461	0.657779	1.50104	Chac2/Sms/Ggt7/Gss/Gpx1/Gpx3/Rrm2	7
rno04934	Cushing syndrome	14/598	160/8848	0.192944	0.735166	0.681611	1.29465	Cdkn1a/Rasd1/Cacna1c/Cyp11a1/Kcnk3/Adcy7/Wnt5a/Fzd7/Agt/Mrap/Cdk4/Plcb4/Hsd3b3/Cdkn2a	14
rno04215	Apoptosis - multiple species	4/598	34/8848	0.194746	0.735166	0.681611	1.7407	Casp3/Bid/Bax/Birc5	4
rno05166	Human T-cell leukemia virus 1 infection	21/598	255/8848	0.200954	0.749237	0.694657	1.21849	Cdkn1a/Ran/Pttg1/Bub1b/Tspo/Nrp1/Tp53/Espl1/Adcy7/Ccna2/Ltbr/Nfatc4/Bax/Cdk4/Cdc20/RT1-T24-1/Chek2/Slc25a5/LOC100912399/Tcf3/Cdkn2a	21
rno05016	Huntington disease	17/598	202/8848	0.205597	0.754872	0.699881	1.24521	Ndufa4/Casp3/Tp53/Cyc1/Polr2e/Uqcr11/Uqcrfs1/Sod2/Bax/Dnai2/Taf4b/Plcb4/Slc25a5/Uqcrq/Ndufa11/Gpx1/Cox7b	17
rno04918	Thyroid hormone synthesis	7/598	72/8848	0.212025	0.754872	0.699881	1.4385	Tshr/Adcy7/Atp1a1/Plcb4/Gpx1/Gpx3/Ttf2	7
rno04977	Vitamin digestion and absorption	3/598	24/8848	0.21857	0.754872	0.699881	1.8495	Rbp2/Abcc1/Plb1	3
rno04010	MAPK signaling pathway	24/598	300/8848	0.221153	0.754872	0.699881	1.18368	Daxx/Map3k20/Rps6ka6/Pla2g4a/Vegfd/Dusp1/Angpt4/Pgf/Angpt1/Cacna1c/Fgf7/Casp3/Tp53/Vegfc/Mecom/Pdgfrb/Map4k1/Dusp6/Arrb1/Map3k5/Cacna2d1/Fgf18/Map2k3/LOC100912399	24
rno03030	DNA replication	4/598	36/8848	0.223587	0.754872	0.699881	1.644	Rfc3/Mcm7/Mcm4/Prim1	4
rno04911	Insulin secretion	8/598	87/8848	0.233432	0.754872	0.699881	1.36055	Kcnma1/Gip/Cacna1c/Adcyap1r1/Adcy7/Trpm4/Atp1a1/Plcb4	8
rno04925	Aldosterone synthesis and secretion	9/598	100/8848	0.233481	0.754872	0.699881	1.33164	Cacna1c/Cyp11a1/Kcnk3/Npr1/Adcy7/Agt/Atp1a1/Plcb4/Hsd3b3	9
rno05216	Thyroid cancer	4/598	37/8848	0.238404	0.754872	0.699881	1.59957	Cdkn1a/Rxra/Tp53/Bax	4
rno01200	Carbon metabolism	11/598	127/8848	0.238997	0.754872	0.699881	1.28154	Pkm/Gcsh/Got2/Eno1/LOC108351137/LOC100364062/Pgam1/LOC100911515/Glud1/Pgk1/Gpt2	11
rno01212	Fatty acid metabolism	6/598	62/8848	0.239991	0.754872	0.699881	1.43187	Mcat/Acsl1/LOC681458/Scd/Acsl5/Acsl4	6
rno05214	Glioma	7/598	75/8848	0.242345	0.754872	0.699881	1.38096	Cdkn1a/Tp53/Shc3/Pdgfrb/Bax/Cdk4/Cdkn2a	7
rno04146	Peroxisome	8/598	88/8848	0.242882	0.754872	0.699881	1.34509	Xdh/Hmgcl/Acsl1/Acsl5/Sod2/Acsl4/Prdx5/LOC497963	8
rno04540	Gap junction	8/598	88/8848	0.242882	0.754872	0.699881	1.34509	Cdk1/Htr2a/Adcy7/Tubb3/Htr2b/Pdgfrb/Plcb4/Tuba8	8
rno04210	Apoptosis	12/598	141/8848	0.244174	0.754872	0.699881	1.25923	Daxx/LOC103689977/Casp3/Tp53/Bid/Dffa/Ctsc/LOC100911519/Bax/Map3k5/Tuba8/Birc5	12
rno03013	RNA transport	14/598	168/8848	0.245103	0.754872	0.699881	1.233	Thoc3/Ran/Eif3b/Pop1/Eif2b2/Prmt5/Aaas/Tacc3/Smn1/Nup93/Pop7/Eif4a1/Sumo3/Nup43	14
rno04930	Type II diabetes mellitus	5/598	50/8848	0.247429	0.754872	0.699881	1.4796	Adipoq/Socs3/Cacna1c/Pkm/LOC100364062	5
rno04080	Neuroactive ligand-receptor interaction	28/598	361/8848	0.248302	0.754872	0.699881	1.14761	Lpar4/Glp2r/Tshr/Sstr4/Gip/Thrb/Gria3/Penk/Htr2a/Oprd1/Tspo/Adcyap1r1/Npw/Ptafr/Glra1/S1pr3/Ptgir/Htr2b/Agt/S1pr2/Pth1r/Rxfp1/Gria1/Npy/Bdkrb2/Agtr2/Gabrq/Gabre	28
rno04723	Retrograde endocannabinoid signaling	13/598	155/8848	0.248443	0.754872	0.699881	1.24095	Ptgs2/Ndufa4/Cacna1c/Gria3/Abhd6/Mgll/Adcy7/Gng8/Plcb4/Gria1/Ndufa11/Gabrq/Gabre	13
rno05230	Central carbon metabolism in cancer	6/598	63/8848	0.25144	0.754872	0.699881	1.40914	Tp53/Pkm/Ldha/Pdgfrb/LOC100364062/Pgam1	6
rno04211	Longevity regulating pathway	8/598	89/8848	0.252457	0.754872	0.699881	1.32998	Adipoq/Atg101/Tp53/Adcy7/Sod2/Akt1s1/Bax/Ehmt2	8
rno04530	Tight junction	14/598	170/8848	0.258938	0.766659	0.710809	1.21849	Cldn15/Cldn14/Runx1/Cldn9/Sympk/Vasp/Rab13/Micall2/Dlg2/Cdk4/Map3k5/Tuba8/LOC100912399/Myh11	14
rno00790	Folate biosynthesis	3/598	27/8848	0.274135	0.803775	0.745222	1.644	Pah/LOC102556347/Fpgs	3
rno00350	Tyrosine metabolism	4/598	40/8848	0.284048	0.808978	0.750046	1.4796	Aldh3a1/LOC103694877/Got2/Adh7	4
rno04614	Renin-angiotensin system	4/598	40/8848	0.284048	0.808978	0.750046	1.4796	Agt/Thop1/Agtr2/Ace	4
rno05033	Nicotine addiction	4/598	40/8848	0.284048	0.808978	0.750046	1.4796	Gria3/Gria1/Gabrq/Gabre	4
rno05223	Non-small cell lung cancer	6/598	66/8848	0.286625	0.808978	0.750046	1.34509	Cdkn1a/Rxra/Tp53/Bax/Cdk4/Cdkn2a	6
rno05032	Morphine addiction	8/598	93/8848	0.291851	0.816103	0.756651	1.27277	Pde4b/Pde7b/Adcy7/Gng8/Arrb1/Gabrq/Pde1a/Gabre	8
rno04912	GnRH signaling pathway	8/598	94/8848	0.301933	0.833641	0.772912	1.25923	Pla2g4a/Cacna1c/Mmp14/Adcy7/Mmp2/Plcb4/Map2k3/LOC100912399	8
rno04270	Vascular smooth muscle contraction	11/598	135/8848	0.304126	0.833641	0.772912	1.2056	Pla2g4a/Kcnma1/Cacna1c/Npr1/Adcy7/Ptgir/Mylk3/Agt/Plcb4/Myh11/Acta2	11
rno05224	Breast cancer	12/598	149/8848	0.306404	0.833641	0.772912	1.19162	Cdkn1a/Notch3/Pgr/Fgf7/Tp53/Shc3/Wnt5a/Fzd7/Bax/Peg12/Cdk4/Fgf18	12
rno05165	Human papillomavirus infection	27/598	360/8848	0.31311	0.838805	0.7777	1.1097	Cdkn1a/Ibsp/Ptgs2/Tnn/Notch3/Tubg2/Itga11/Casp3/Tp53/Pkm/Atp6v1e1/Ccna2/Wnt5a/Fzd7/Pdgfrb/Tubg1/Bax/Itga10/Dlg2/Cdk4/Rbpjl/LOC100364062/RT1-T24-1/Spp1/Thbs1/Itga5/Itga2	27
rno04913	Ovarian steroidogenesis	5/598	55/8848	0.313858	0.838805	0.7777	1.34509	Ptgs2/Pla2g4a/Cyp11a1/Adcy7/Hsd3b3	5
rno00983	Drug metabolism - other enzymes	8/598	96/8848	0.322319	0.853864	0.791662	1.233	Nme1/Upp1/Xdh/Ces2g/Itpa/Tymp/Tk1/Rrm2	8
rno00590	Arachidonic acid metabolism	7/598	83/8848	0.328641	0.863039	0.800168	1.24785	Ptgs2/Pla2g4a/Ptgs1/Plb1/Gpx1/LOC102556347/Gpx3	7
rno04071	Sphingolipid signaling pathway	10/598	125/8848	0.337123	0.877682	0.813745	1.18368	Oprd1/Tp53/Bid/S1pr3/S1pr2/Bax/Abcc1/Map3k5/Plcb4/Bdkrb2	10
rno00440	Phosphonate and phosphinate metabolism	1/598	6/8848	0.342948	0.885217	0.820731	2.466	Pcyt2	1
rno04726	Serotonergic synapse	10/598	126/8848	0.34625	0.886166	0.821611	1.17428	Ptgs2/Pla2g4a/Dusp1/Cacna1c/Ptgs1/Htr2a/Casp3/Gng8/Htr2b/Plcb4	10
rno05134	Legionellosis	5/598	58/8848	0.354798	0.895053	0.82985	1.27552	Cxcl1/Casp3/Bcl2l13/Pycard/Cxcl3	5
rno04371	Apelin signaling pathway	11/598	141/8848	0.35565	0.895053	0.82985	1.1543	Serpine1/Notch3/Adcy7/Plin1/Gng8/Mylk3/Plcb4/Spp1/Myl4/LOC497963/Acta2	11
rno04713	Circadian entrainment	8/598	100/8848	0.363756	0.907887	0.84175	1.18368	Rasd1/Cacna1c/Gria3/Adcyap1r1/Adcy7/Gng8/Plcb4/Gria1	8
rno00500	Starch and sucrose metabolism	3/598	32/8848	0.368786	0.912897	0.846394	1.38712	Enpp3/Enpp1/Gys2	3
rno04972	Pancreatic secretion	8/598	101/8848	0.374207	0.918784	0.851853	1.17196	Bst1/Kcnma1/Tpcn2/Clca2/Adcy7/Atp1a1/Plcb4/Clca4l	8
rno04611	Platelet activation	10/598	130/8848	0.3831	0.928137	0.860524	1.13815	Pla2g4a/Col3a1/Ptgs1/Adcy7/Vasp/Ptgir/Mylk3/Apbb1ip/Plcb4/Itga2	10
rno05212	Pancreatic cancer	6/598	74/8848	0.384163	0.928137	0.860524	1.19967	Cdkn1a/Tp53/Bax/Cdk4/Rad51/Cdkn2a	6
rno04714	Thermogenesis	18/598	245/8848	0.391291	0.932598	0.864661	1.08705	Rps6ka6/Ndufa4/Acsl1/Cyc1/Mgll/Npr1/Adcy7/Plin1/Acsl5/Uqcr11/Uqcrfs1/Acsl4/Akt1s1/Map3k5/Uqcrq/Ndufa11/Map2k3/Cox7b	18
rno00071	Fatty acid degradation	4/598	47/8848	0.393635	0.932598	0.864661	1.25923	Acsl1/Acsl5/Acsl4/Adh7	4
rno04971	Gastric acid secretion	6/598	75/8848	0.396495	0.932598	0.864661	1.18368	Kcnj16/Kcnj2/Adcy7/Mylk3/Atp1a1/Plcb4	6
rno04510	Focal adhesion	15/598	203/8848	0.398362	0.932598	0.864661	1.0933	Ibsp/Tnn/Vegfd/Pgf/Itga11/Vegfc/Shc3/Vasp/Mylk3/Pdgfrb/Itga10/Spp1/Thbs1/Itga5/Itga2	15
rno02010	ABC transporters	4/598	49/8848	0.424767	0.986767	0.914884	1.20784	Abcc1/Abca13/Abcc9/Abca6	4
rno00562	Inositol phosphate metabolism	6/598	78/8848	0.43338	0.99152	0.91929	1.13815	Plch1/Mtmr7/Impa2/Impad1/Plcb4/LOC100911515	6
rno04970	Salivary secretion	6/598	78/8848	0.43338	0.99152	0.91929	1.13815	Bst1/Kcnma1/Lpo/Adcy7/Atp1a1/Plcb4	6
rno04622	RIG-I-like receptor signaling pathway	5/598	64/8848	0.436834	0.991909	0.919651	1.15594	Nfkbib/Pin1/Ddx3x/LOC100912399/Rnf125	5
rno05323	Rheumatoid arthritis	7/598	93/8848	0.441201	0.992504	0.920202	1.11368	Cd80/Cxcl6/Angpt1/Ccl2/Atp6v1e1/Ccl20/Mmp3	7
rno00514	Other types of O-glycan biosynthesis	2/598	22/8848	0.443669	0.992504	0.920202	1.34509	Plod3/B4galt1	2
rno04974	Protein digestion and absorption	7/598	94/8848	0.452406	0.997418	0.924758	1.10183	Col18a1/Col3a1/Xpnpep2/Col17a1/Col5a3/Atp1a1/Col15a1	7
rno05012	Parkinson disease	11/598	152/8848	0.452471	0.997418	0.924758	1.07076	Ube2g2/Ndufa4/Casp3/Cyc1/Uqcr11/Uqcrfs1/Sept5/Slc25a5/Uqcrq/Ndufa11/Cox7b	11
rno03015	mRNA surveillance pathway	7/598	95/8848	0.463568	0.999877	0.927038	1.09023	Smg6/Sympk/Dazap1/Pabpn1/Nudt21/Gspt1/Cstf2	7
rno03430	Mismatch repair	2/598	23/8848	0.466819	0.999877	0.927038	1.28661	Rfc3/Exo1	2
rno04015	Rap1 signaling pathway	15/598	213/8848	0.473314	0.999877	0.927038	1.04197	Lpar4/Vegfd/Angpt4/Pgf/Angpt1/Fgf7/Vegfc/Adcy7/Vasp/Apbb1ip/Pdgfrb/Plcb4/Thbs1/Fgf18/Map2k3	15
rno05416	Viral myocarditis	7/598	96/8848	0.474677	0.999877	0.927038	1.07887	Cd80/Sgcb/Cd55/Casp3/Bid/Sgcg/RT1-T24-1	7
rno05160	Hepatitis C	11/598	155/8848	0.47878	0.999877	0.927038	1.05004	Cdkn1a/Cldn15/Cldn14/Socs3/Cldn9/Rxra/Casp3/Tp53/Bid/Bax/Cdk4	11
rno05010	Alzheimer disease	13/598	185/8848	0.483932	0.999877	0.927038	1.03972	Ndufa4/Cacna1c/Casp3/Lpl/Bid/Cyc1/Uqcr11/Uqcrfs1/LOC108351137/Plcb4/Uqcrq/Ndufa11/Cox7b	13
rno04610	Complement and coagulation cascades	6/598	83/8848	0.493834	0.999877	0.927038	1.06959	Serpine1/Cd55/Cfd/Plaur/Bdkrb2/F5	6
rno04151	PI3K-Akt signaling pathway	24/598	349/8848	0.496001	0.999877	0.927038	1.01749	Cdkn1a/Ibsp/Lpar4/Tnn/Vegfd/Angpt4/Pgf/Angpt1/Itga11/Fgf7/Rxra/Tp53/Vegfc/Il4r/Gng8/Pdgfrb/Itga10/Cdk4/Spp1/Thbs1/Fgf18/Itga5/Itga2/Gys2	24
rno04921	Oxytocin signaling pathway	11/598	157/8848	0.496185	0.999877	0.927038	1.03666	Cdkn1a/Ptgs2/Pla2g4a/Kcnj2/Cacna1c/Npr1/Adcy7/Mylk3/Nfatc4/Plcb4/Cacna2d1	11
rno00620	Pyruvate metabolism	3/598	39/8848	0.496394	0.999877	0.927038	1.13815	Pkm/Ldha/LOC100364062	3
rno04022	cGMP-PKG signaling pathway	12/598	172/8848	0.498119	0.999877	0.927038	1.03228	Kcnma1/Cacna1c/Oprd1/Npr1/Adcy7/Vasp/Mylk3/Nfatc4/Atp1a1/Plcb4/Slc25a5/Bdkrb2	12
rno00592	alpha-Linolenic acid metabolism	2/598	25/8848	0.511346	0.999877	0.927038	1.18368	Pla2g4a/Plb1	2
rno04975	Fat digestion and absorption	3/598	40/8848	0.513611	0.999877	0.927038	1.1097	Got2/Dgat2/Dgat1	3
rno05161	Hepatitis B	11/598	160/8848	0.522016	0.999877	0.927038	1.01722	Cdkn1a/Casp3/Tp53/Bid/Ccna2/Nfatc4/Bax/Ddx3x/Map2k3/LOC100912399/Birc5	11
rno04724	Glutamatergic synapse	8/598	116/8848	0.52943	0.999877	0.927038	1.02041	Pla2g4a/Cacna1c/Gria3/Adcy7/Gng8/Homer3/Plcb4/Gria1	8
rno04623	Cytosolic DNA-sensing pathway	4/598	56/8848	0.529533	0.999877	0.927038	1.05686	Polr3b/Polr2e/Pycard/Nfkbib	4
rno05205	Proteoglycans in cancer	14/598	206/8848	0.531906	0.999877	0.927038	1.00555	Cdkn1a/Casp3/Tp53/Sdc4/Pdcd4/Wnt5a/Fzd7/Mmp2/Twist2/Plaur/Thbs1/Itga5/Itga2/Sdc1	14
rno00072	Synthesis and degradation of ketone bodies	1/598	11/8848	0.537085	0.999877	0.927038	1.34509	Hmgcl	1
rno00430	Taurine and hypotaurine metabolism	1/598	11/8848	0.537085	0.999877	0.927038	1.34509	Ggt7	1
rno04750	Inflammatory mediator regulation of TRP channels	8/598	117/8848	0.539379	0.999877	0.927038	1.01169	Pla2g4a/Htr2a/Adcy7/Htr2b/Asic4/Plcb4/Bdkrb2/Map2k3	8
rno04961	Endocrine and other factor-regulated calcium reabsorption	4/598	57/8848	0.543754	0.999877	0.927038	1.03831	Pth1r/Atp1a1/Plcb4/Bdkrb2	4
rno04922	Glucagon signaling pathway	7/598	103/8848	0.550386	0.999877	0.927038	1.00555	Pkm/Ldha/Prmt1/LOC100364062/Plcb4/Pgam1/Gys2	7
rno04020	Calcium signaling pathway	13/598	195/8848	0.562348	0.999877	0.927038	0.986399	Cacna1c/Htr2a/Ptafr/Tpcn2/Adcy7/Mylk3/Htr2b/Pdgfrb/Plcb4/Slc25a5/Bdkrb2/Pde1a/LOC497963	13
rno05133	Pertussis	5/598	74/8848	0.566626	0.999877	0.927038	0.999729	Cxcl6/Casp3/Pycard/LOC497963/Itga5	5
rno05226	Gastric cancer	10/598	151/8848	0.573931	0.999877	0.927038	0.979867	Cdkn1a/Fgf7/Rxra/Tp53/Shc3/Wnt5a/Fzd7/Bax/Peg12/Fgf18	10
rno00310	Lysine degradation	4/598	60/8848	0.585034	0.999877	0.927038	0.986399	Plod3/Aadat/Plod2/Ehmt2	4
rno03450	Non-homologous end-joining	1/598	13/8848	0.597619	0.999877	0.927038	1.13815	Polm	1
rno04550	Signaling pathways regulating pluripotency of stem cells	9/598	140/8848	0.611286	0.999877	0.927038	0.951171	Id2/Isl1/Wnt5a/Fzd7/Klf4/Jarid2/Tcf3/LOC103691556/Lefty2	9
rno04730	Long-term depression	4/598	62/8848	0.611316	0.999877	0.927038	0.95458	Pla2g4a/Gria3/Plcb4/Gria1	4
rno00630	Glyoxylate and dicarboxylate metabolism	2/598	30/8848	0.611453	0.999877	0.927038	0.986399	Gcsh/Hoga1	2
rno04722	Neurotrophin signaling pathway	8/598	125/8848	0.615654	0.999877	0.927038	0.946943	Sh2b2/Rps6ka6/Tp53/Shc3/Nfkbib/Bax/Map3k5/LOC100912399	8
rno04931	Insulin resistance	7/598	110/8848	0.621034	0.999877	0.927038	0.941563	Rps6ka6/Gfpt2/Socs3/Agt/Gfpt1/Slc27a6/Gys2	7
rno05204	Chemical carcinogenesis	6/598	95/8848	0.627826	0.999877	0.927038	0.934483	Aldh3a1/Ptgs2/Hsd11b1/Adh7/Kyat3/LOC102556347	6
rno00062	Fatty acid elongation	2/598	31/8848	0.629492	0.999877	0.927038	0.95458	Acot7/Acot5	2
rno00601	Glycosphingolipid biosynthesis - lacto and neolacto series	2/598	31/8848	0.629492	0.999877	0.927038	0.95458	B3galt1/B4galt1	2
rno01523	Antifolate resistance	2/598	31/8848	0.629492	0.999877	0.927038	0.95458	Abcc1/Fpgs	2
rno00380	Tryptophan metabolism	3/598	48/8848	0.638851	0.999877	0.927038	0.924749	Asmt/Aadat/Kyat3	3
rno03020	RNA polymerase	2/598	32/8848	0.646873	0.999877	0.927038	0.924749	Polr3b/Polr2e	2
rno04640	Hematopoietic cell lineage	6/598	97/8848	0.648078	0.999877	0.927038	0.915216	Cd55/Il4r/Il9r/Cd34/Itga5/Itga2	6
rno05215	Prostate cancer	6/598	97/8848	0.648078	0.999877	0.927038	0.915216	Cdkn1a/Erg/Ar/Tp53/Pdgfrb/Mmp3	6
rno00604	Glycosphingolipid biosynthesis - ganglio series	1/598	15/8848	0.650249	0.999877	0.927038	0.986399	St3gal1	1
rno04261	Adrenergic signaling in cardiomyocytes	9/598	145/8848	0.653347	0.999877	0.927038	0.918372	Cacna1c/Adcy7/Crem/Agt/Atp1a1/Plcb4/Cacna2d1/Agtr2/Myl4	9
rno04310	Wnt signaling pathway	10/598	161/8848	0.655714	0.999877	0.927038	0.919005	Serpinf1/Wisp1/Tp53/Prickle2/Wnt5a/Fzd7/Nfatc4/Peg12/Plcb4/Ror2	10
rno04070	Phosphatidylinositol signaling system	6/598	98/8848	0.65795	0.999877	0.927038	0.905877	Mtmr7/Impa2/Ip6k2/Dgkd/Impad1/Plcb4	6
rno04720	Long-term potentiation	4/598	66/8848	0.660694	0.999877	0.927038	0.896726	Rps6ka6/Cacna1c/Plcb4/Gria1	4
rno05031	Amphetamine addiction	4/598	66/8848	0.660694	0.999877	0.927038	0.896726	Cacna1c/Gria3/Gria1/Fosb	4
rno05321	Inflammatory bowel disease (IBD)	4/598	66/8848	0.660694	0.999877	0.927038	0.896726	Maf/Il18r1/Il4r/Il18rap	4
rno00410	beta-Alanine metabolism	2/598	33/8848	0.663601	0.999877	0.927038	0.896726	Aldh3a1/Sms	2
rno04136	Autophagy - other	2/598	33/8848	0.663601	0.999877	0.927038	0.896726	Atg101/Atg2a	2
rno04514	Cell adhesion molecules (CAMs)	11/598	178/8848	0.665535	0.999877	0.927038	0.914359	Cldn15/Cd80/Cldn14/Cldn9/Lrrc4/Sdc4/Vcan/RT1-T24-1/Glycam1/Cd34/Sdc1	11
rno04024	cAMP signaling pathway	13/598	210/8848	0.670174	0.999877	0.927038	0.915942	Tshr/Pde4b/Gip/Cacna1c/Gria3/Adcyap1r1/Gli3/Npr1/Adcy7/Hhip/Atp1a1/Gria1/Npy	13
rno00603	Glycosphingolipid biosynthesis - globo and isoglobo series	1/598	16/8848	0.673928	0.999877	0.927038	0.924749	St3gal1	1
rno05132	Salmonella infection	5/598	84/8848	0.679304	0.999877	0.927038	0.880713	Cxcl1/Pycard/Cxcl3/Wasf1/LOC497963	5
rno04979	Cholesterol metabolism	3/598	51/8848	0.679565	0.999877	0.927038	0.870352	Tspo/Angptl8/Lpl	3
rno00830	Retinol metabolism	5/598	85/8848	0.689421	0.999877	0.927038	0.870352	Bco1/Cyp26b1/Dgat1/Adh7/Dhrs9	5
rno05167	Kaposi sarcoma-associated herpesvirus infection	13/598	213/8848	0.68986	0.999877	0.927038	0.903041	Cdkn1a/Ptgs2/Cxcl1/Ccr1/Casp3/Tp53/Bid/Gng8/Nfatc4/Bax/Cdk4/Cxcl3/RT1-T24-1	13
rno04330	Notch signaling pathway	3/598	52/8848	0.692357	0.999877	0.927038	0.853615	Notch3/Dtx4/Rbpjl	3
rno05164	Influenza A	10/598	166/8848	0.693102	0.999877	0.927038	0.891324	Socs3/Ccl2/Casp3/Bid/Pycard/Nfkbib/Bax/Cdk4/Slc25a5/Pabpn1	10
rno04064	NF-kappa B signaling pathway	6/598	102/8848	0.695686	0.999877	0.927038	0.870352	Ptgs2/Eda2r/LOC100911519/Ltbr/Edar/Card14	6
rno00730	Thiamine metabolism	1/598	17/8848	0.696006	0.999877	0.927038	0.870352	Ak2	1
rno04072	Phospholipase D signaling pathway	9/598	151/8848	0.700229	0.999877	0.927038	0.88188	Cyth3/Lpar4/Pla2g4a/Shc3/Adcy7/Agt/Pdgfrb/Dgkd/Plcb4	9
rno05418	Fluid shear stress and atherosclerosis	9/598	152/8848	0.707639	0.999877	0.927038	0.876078	Dusp1/Ccl2/Tp53/Sdc4/Mmp2/Map3k5/Sumo3/Nox1/Sdc1	9
rno00670	One carbon pool by folate	1/598	18/8848	0.716591	0.999877	0.927038	0.821999	Aldh1l2	1
rno05210	Colorectal cancer	5/598	88/8848	0.718456	0.999877	0.927038	0.840681	Cdkn1a/Casp3/Tp53/Bax/Birc5	5
rno00100	Steroid biosynthesis	1/598	19/8848	0.735784	0.999877	0.927038	0.778736	Cyp27b1	1
rno00450	Selenocompound metabolism	1/598	19/8848	0.735784	0.999877	0.927038	0.778736	Kyat3	1
rno04976	Bile secretion	4/598	73/8848	0.736424	0.999877	0.927038	0.810739	Rxra/Aqp8/Adcy7/Atp1a1	4
rno05163	Human cytomegalovirus infection	15/598	253/8848	0.739113	0.999877	0.927038	0.877232	Cdkn1a/Ptgs2/Ccr1/Ccl2/Casp3/Tp53/Bid/Adcy7/Gng8/Nfatc4/Bax/Cdk4/RT1-T24-1/Plcb4/Cdkn2a	15
rno00980	Metabolism of xenobiotics by cytochrome P450	4/598	74/8848	0.746127	0.999877	0.927038	0.799783	Aldh3a1/Hsd11b1/Adh7/LOC102556347	4
rno04810	Regulation of actin cytoskeleton	13/598	223/8848	0.750276	0.999877	0.927038	0.862546	Lpar4/Itga11/Diaph3/Fgf7/Mylk3/Pdgfrb/Itga10/Iqgap3/Bdkrb2/Wasf1/Fgf18/Itga5/Itga2	13
rno00051	Fructose and mannose metabolism	2/598	39/8848	0.750868	0.999877	0.927038	0.758769	Pfkfb3/LOC100911515	2
rno04727	GABAergic synapse	5/598	92/8848	0.75409	0.999877	0.927038	0.80413	Cacna1c/Adcy7/Gng8/Gabrq/Gabre	5
rno05142	Chagas disease (American trypanosomiasis)	6/598	109/8848	0.754787	0.999877	0.927038	0.814458	Serpine1/Ccl2/Plcb4/Bdkrb2/LOC497963/Ace	6
rno00190	Oxidative phosphorylation	8/598	143/8848	0.759441	0.999877	0.927038	0.827748	Ndufa4/Atp6v1e1/Cyc1/Uqcr11/Uqcrfs1/Uqcrq/Ndufa11/Cox7b	8
rno04370	VEGF signaling pathway	3/598	58/8848	0.76107	0.999877	0.927038	0.76531	Ptgs2/Pla2g4a/Sh2d2a	3
rno05213	Endometrial cancer	3/598	58/8848	0.76107	0.999877	0.927038	0.76531	Cdkn1a/Tp53/Bax	3
rno00260	Glycine, serine and threonine metabolism	2/598	40/8848	0.763355	0.999877	0.927038	0.739799	Gcsh/Pgam1	2
rno04152	AMPK signaling pathway	7/598	127/8848	0.763914	0.999877	0.927038	0.815527	Adipoq/LOC681458/Scd/Ccna2/Pfkfb3/Akt1s1/Gys2	7
rno04658	Th1 and Th2 cell differentiation	5/598	94/8848	0.770598	0.999877	0.927038	0.787021	Notch3/Maf/Il4r/Nfkbib/Rbpjl	5
rno04620	Toll-like receptor signaling pathway	5/598	95/8848	0.77853	0.999877	0.927038	0.778736	Cd80/Cxcl9/Spp1/Tlr8/Map2k3	5
rno05144	Malaria	3/598	60/8848	0.781025	0.999877	0.927038	0.739799	Ccl2/Thbs1/Sdc1	3
rno05225	Hepatocellular carcinoma	10/598	180/8848	0.783732	0.999877	0.927038	0.821999	Cdkn1a/Tp53/Shc3/Brd7/Wnt5a/Fzd7/Bax/Peg12/Cdk4/Cdkn2a	10
rno00591	Linoleic acid metabolism	2/598	42/8848	0.786706	0.999877	0.927038	0.704571	Pla2g4a/Plb1	2
rno04141	Protein processing in endoplasmic reticulum	9/598	164/8848	0.78722	0.999877	0.927038	0.811975	Ube2g2/Erp29/Sec61b/Rpn2/Ckap4/Bag2/Bax/Map3k5/P4hb	9
rno04725	Cholinergic synapse	6/598	114/8848	0.791578	0.999877	0.927038	0.778736	Kcnj2/Cacna1c/Kcnq5/Adcy7/Gng8/Plcb4	6
rno05143	African trypanosomiasis	2/598	43/8848	0.797605	0.999877	0.927038	0.688185	Thop1/Plcb4	2
rno01521	EGFR tyrosine kinase inhibitor resistance	4/598	80/8848	0.798677	0.999877	0.927038	0.739799	Nrg1/Shc3/Pdgfrb/Bax	4
rno04213	Longevity regulating pathway - multiple species	3/598	63/8848	0.808362	0.999877	0.927038	0.704571	Adcy7/Sod2/Akt1s1	3
rno04068	FoxO signaling pathway	7/598	134/8848	0.809883	0.999877	0.927038	0.772925	Cdkn1a/Plk4/Plk1/Sod2/Homer3/Prmt1/Ccnb1	7
rno04915	Estrogen signaling pathway	7/598	134/8848	0.809883	0.999877	0.927038	0.772925	Pgr/Krt23/Shc3/Adcy7/Mmp2/Krt10/Plcb4	7
rno00340	Histidine metabolism	1/598	24/8848	0.813951	0.999877	0.927038	0.616499	Aldh3a1	1
rno00515	Mannose type O-glycan biosynthesis	1/598	24/8848	0.813951	0.999877	0.927038	0.616499	B4galt1	1
rno04919	Thyroid hormone signaling pathway	6/598	118/8848	0.817852	0.999877	0.927038	0.752338	Notch3/Thrb/Rxra/Tp53/Atp1a1/Plcb4	6
rno04137	Mitophagy - animal	3/598	65/8848	0.824943	0.999877	0.927038	0.682892	Tp53/Bcl2l13/Pgam5	3
rno05206	MicroRNAs in cancer	15/598	271/8848	0.825082	0.999877	0.927038	0.818966	Cdkn1a/Ptgs2/Tnn/Zfpm2/Notch3/Casp3/Tp53/Kif23/Pdcd4/Pdgfrb/Abcc1/Cdc25c/Thbs1/Itga5/Cdkn2a	15
rno05221	Acute myeloid leukemia	3/598	66/8848	0.832764	0.999877	0.927038	0.672545	Runx1/Cebpa/Dusp6	3
rno00565	Ether lipid metabolism	2/598	47/8848	0.83641	0.999877	0.927038	0.629616	Pla2g4a/Plb1	2
rno03420	Nucleotide excision repair	2/598	47/8848	0.83641	0.999877	0.927038	0.629616	Gtf2h4/Rfc3	2
rno03060	Protein export	1/598	26/8848	0.838314	0.999877	0.927038	0.569076	Sec61b	1
rno04120	Ubiquitin mediated proteolysis	7/598	141/8848	0.848643	0.999877	0.927038	0.734553	Ube2g2/Socs3/Herc3/Ube2c/Ube2s/Cdc20/LOC100912399	7
rno04966	Collecting duct acid secretion	1/598	27/8848	0.849274	0.999877	0.927038	0.548	Atp6v1e1	1
rno04672	Intestinal immune network for IgA production	2/598	49/8848	0.853178	0.999877	0.927038	0.603918	Cd80/Ltbr	2
rno00650	Butanoate metabolism	1/598	28/8848	0.859492	0.999877	0.927038	0.528428	Hmgcl	1
rno00510	N-Glycan biosynthesis	2/598	52/8848	0.875405	0.999877	0.927038	0.569076	Rpn2/B4galt1	2
rno04360	Axon guidance	9/598	183/8848	0.878919	0.999877	0.927038	0.727671	Lrrc4/Dpysl5/Nrp1/Ephb6/Wnt5a/Epha1/Nfatc4/Sema3a/Epha3	9
rno00982	Drug metabolism - cytochrome P450	3/598	73/8848	0.879519	0.999877	0.927038	0.608054	Aldh3a1/Fmo5/Adh7	3
rno05169	Epstein-Barr virus infection	12/598	237/8848	0.885692	0.999877	0.927038	0.749164	Cdkn1a/Psmc5/Casp3/Tp53/Bid/Ccna2/Nfkbib/Bax/Cdk4/Rbpjl/RT1-T24-1/Map2k3	12
rno04014	Ras signaling pathway	12/598	238/8848	0.888902	0.999877	0.927038	0.746016	Pla2g4a/Vegfd/Angpt4/Pgf/Angpt1/Fgf7/Vegfc/Shc3/Gng8/Rasa3/Pdgfrb/Fgf18	12
rno05140	Leishmaniasis	3/598	75/8848	0.890556	0.999877	0.927038	0.591839	Ptgs2/Nfkbib/LOC497963	3
rno00052	Galactose metabolism	1/598	32/8848	0.8939	0.999877	0.927038	0.462375	B4galt1	1
rno00640	Propanoate metabolism	1/598	32/8848	0.8939	0.999877	0.927038	0.462375	Ldha	1
rno05150	Staphylococcus aureus infection	3/598	76/8848	0.895727	0.999877	0.927038	0.584052	Ptafr/Krt10/Cfd	3
rno04670	Leukocyte transendothelial migration	5/598	115/8848	0.89639	0.999877	0.927038	0.643304	Cldn15/Cldn14/Cldn9/Vasp/Mmp2	5
rno00280	Valine, leucine and isoleucine degradation	2/598	56/8848	0.90023	0.999877	0.927038	0.528428	Hmgcl/Bcat1	2
rno00020	Citrate cycle (TCA cycle)	1/598	33/8848	0.901097	0.999877	0.927038	0.448363	Acly	1
rno05100	Bacterial invasion of epithelial cells	3/598	78/8848	0.905417	0.999877	0.927038	0.569076	Shc3/Wasf1/Itga5	3
rno05020	Prion diseases	1/598	34/8848	0.907807	0.999877	0.927038	0.435176	Bax	1
rno04650	Natural killer cell mediated cytotoxicity	4/598	99/8848	0.909697	0.999877	0.927038	0.597818	Cd244/Casp3/Bid/Shc3	4
rno05146	Amoebiasis	4/598	99/8848	0.909697	0.999877	0.927038	0.597818	Col3a1/Casp3/Plcb4/LOC497963	4
rno05231	Choline metabolism in cancer	4/598	99/8848	0.909697	0.999877	0.927038	0.597818	Pla2g4a/Pdgfrb/Dgkd/Wasf1	4
rno04916	Melanogenesis	4/598	100/8848	0.91364	0.999877	0.927038	0.591839	Adcy7/Wnt5a/Fzd7/Plcb4	4
rno04940	Type I diabetes mellitus	3/598	80/8848	0.914285	0.999877	0.927038	0.554849	Cd80/Ptprn/RT1-T24-1	3
rno05320	Autoimmune thyroid disease	3/598	81/8848	0.91843	0.999877	0.927038	0.548	Cd80/Tshr/RT1-T24-1	3
rno03410	Base excision repair	1/598	37/8848	0.925329	0.999877	0.927038	0.399892	Apex1	1
rno04145	Phagosome	9/598	198/8848	0.925982	0.999877	0.927038	0.672545	Sec61b/Mrc2/Atp6v1e1/Tubb3/RT1-T24-1/Thbs1/Tuba8/Itga5/Itga2	9
rno00140	Steroid hormone biosynthesis	3/598	85/8848	0.933243	0.999877	0.927038	0.522211	Hsd11b1/Cyp11a1/Hsd3b3	3
rno05162	Measles	6/598	145/8848	0.933348	0.999877	0.927038	0.612248	Casp3/Tp53/Bid/Nfkbib/Bax/Cdk4	6
rno04960	Aldosterone-regulated sodium reabsorption	1/598	39/8848	0.935122	0.999877	0.927038	0.379384	Atp1a1	1
rno04012	ErbB signaling pathway	3/598	88/8848	0.942681	0.999877	0.927038	0.504409	Cdkn1a/Nrg1/Shc3	3
rno04659	Th17 cell differentiation	4/598	109/8848	0.942766	0.999877	0.927038	0.542972	Runx1/Rxra/Il4r/Nfkbib	4
rno00860	Porphyrin and chlorophyll metabolism	1/598	41/8848	0.943632	0.999877	0.927038	0.360878	Uros	1
rno04666	Fc gamma R-mediated phagocytosis	3/598	89/8848	0.945542	0.999877	0.927038	0.498741	Pla2g4a/Vasp/Wasf1	3
rno04973	Carbohydrate digestion and absorption	1/598	42/8848	0.947459	0.999877	0.927038	0.352285	Atp1a1	1
rno04962	Vasopressin-regulated water reabsorption	1/598	43/8848	0.951027	0.999877	0.927038	0.344093	Aqp3	1
rno04728	Dopaminergic synapse	5/598	133/8848	0.951579	0.999877	0.927038	0.55624	Cacna1c/Gria3/Gng8/Plcb4/Gria1	5
rno00970	Aminoacyl-tRNA biosynthesis	2/598	69/8848	0.95259	0.999877	0.927038	0.428869	Vars/Sars2	2
rno04664	Fc epsilon RI signaling pathway	2/598	69/8848	0.95259	0.999877	0.927038	0.428869	Pla2g4a/Map2k3	2
rno04630	JAK-STAT signaling pathway	6/598	155/8848	0.955719	0.999877	0.927038	0.572748	Cdkn1a/Socs3/Il4r/Pdgfrb/Il9r/Ifnlr1	6
rno05332	Graft-versus-host disease	2/598	71/8848	0.957824	0.999877	0.927038	0.416788	Cd80/RT1-T24-1	2
rno04390	Hippo signaling pathway	6/598	157/8848	0.95928	0.999877	0.927038	0.565452	Serpine1/Id2/Wnt5a/Fzd7/Dlg2/Birc5	6
rno04520	Adherens junction	2/598	73/8848	0.962503	0.999877	0.927038	0.405369	Snai1/Wasf1	2
rno04150	mTOR signaling pathway	6/598	159/8848	0.96258	0.999877	0.927038	0.558339	Rps6ka6/Mios/Atp6v1e1/Wnt5a/Fzd7/Akt1s1	6
rno05145	Toxoplasmosis	4/598	118/8848	0.962657	0.999877	0.927038	0.501559	Casp3/Nfkbib/Map2k3/LOC497963	4
rno05030	Cocaine addiction	1/598	47/8848	0.963038	0.999877	0.927038	0.314808	Fosb	1
rno04621	NOD-like receptor signaling pathway	7/598	180/8848	0.964442	0.999877	0.927038	0.575399	Cxcl1/Ccl2/Antxr1/Pycard/Nfkbib/Cxcl3/Plcb4	7
rno04917	Prolactin signaling pathway	2/598	74/8848	0.964652	0.999877	0.927038	0.399892	Socs3/Shc3	2
rno05330	Allograft rejection	2/598	74/8848	0.964652	0.999877	0.927038	0.399892	Cd80/RT1-T24-1	2
rno03050	Proteasome	1/598	48/8848	0.965549	0.999877	0.927038	0.30825	Psmc5	1
rno05170	Human immunodeficiency virus 1 infection	10/598	243/8848	0.970967	0.999877	0.927038	0.608888	Cdk1/Casp3/Bid/Gng8/Nfatc4/Bax/Cdc25c/RT1-T24-1/Map2k3/Ccnb1	10
rno05152	Tuberculosis	7/598	185/8848	0.971016	0.999877	0.927038	0.559848	Mrc2/Casp3/Bid/Bax/Cyp27b1/Cebpb/LOC497963	7
rno04380	Osteoclast differentiation	4/598	129/8848	0.978248	0.999877	0.927038	0.45879	Socs3/Junb/Fosb/Nox1	4
rno04140	Autophagy - animal	4/598	134/8848	0.983089	0.999877	0.927038	0.441671	Atg101/Dapk1/Akt1s1/Atg2a	4
rno04742	Taste transduction	2/598	89/8848	0.985631	0.999877	0.927038	0.332494	Cacna1c/Pde1a	2
rno04625	C-type lectin receptor signaling pathway	3/598	114/8848	0.985653	0.999877	0.927038	0.389368	Ptgs2/Pycard/Nfatc4	3
rno04910	Insulin signaling pathway	4/598	138/8848	0.986208	0.999877	0.927038	0.428869	Sh2b2/Socs3/Shc3/Gys2	4
rno05235	PD-L1 expression and PD-1 checkpoint pathway in cancer	2/598	91/8848	0.987281	0.999877	0.927038	0.325187	Nfkbib/Map2k3	2
rno05211	Renal cell carcinoma	1/598	70/8848	0.992689	0.999877	0.927038	0.211371	Cdkn1a	1
rno04612	Antigen processing and presentation	2/598	101/8848	0.993126	0.999877	0.927038	0.29299	Lgmn/RT1-T24-1	2
rno04142	Lysosome	3/598	129/8848	0.993811	0.999877	0.927038	0.344093	Lgmn/Igf2r/Ctsc	3
rno03010	Ribosome	5/598	179/8848	0.994549	0.999877	0.927038	0.413296	Mrpl21/Mrpl2/Mrps11/Mrps12/Rn5-8s	5
rno04660	T cell receptor signaling pathway	2/598	106/8848	0.994963	0.999877	0.927038	0.27917	Nfkbib/Cdk4	2
rno04721	Synaptic vesicle cycle	1/598	78/8848	0.995843	0.999877	0.927038	0.189692	Atp6v1e1	1
rno04662	B cell receptor signaling pathway	1/598	81/8848	0.996637	0.999877	0.927038	0.182667	Nfkbib	1
rno05168	Herpes simplex virus 1 infection	13/598	414/8848	0.999682	0.999877	0.927038	0.464608	Srsf2/Daxx/Socs3/Eif2b2/Ccl2/Casp3/Tp53/Bid/Zim1/Bax/Sp100/RT1-T24-1/Itga5	13
rno04144	Endocytosis	6/598	275/8848	0.999877	0.999877	0.927038	0.322822	Cyth3/Eps15l1/Igf2r/Snx1/Arrb1/RT1-T24-1	6
